# Supplementary material
Source: PubMed Central journal article supplement (PMC5675001)
Supplement: NIHMS896361-supplement-Supporting_Information.pdf [file NIHMS896361-supplement-Supporting_Information.pdf]

## Supporting Information

### **Bioorthogonal Labeling of Human Prostate Cancer Tissue Slice Cultures for Glycoproteomics**

*David R. Spiciarich, Rosalie Nolley, Sophia L. Maund, Sean C. Purcell, Jason Herschel, Anthony T. Iavarone, Donna M. Peehl, and Carolyn R. Bertozzi\**

anie\_201701424\_sm\_miscellaneous\_information.pdf

## Supporting Information:

### Methods and Materials.

**General reagents.** All chemical and biological reagents were of analytical or cell culture grade, obtained from commercial sources, and used without further purification unless otherwise noted. Ac<sub>4</sub>ManNAz, Ac<sub>4</sub>ManNAI and Ac<sub>4</sub>ManNAc were synthesized as previously described.<sup>[1,2]</sup>

**Metabolic labeling of tissue slice cultures.** Tissue slices from healthy and cancerous prostate tissue were obtained with approval from internal review boards from Stanford University (IRB ID13895) and the University of California, Berkeley for use of material from human subjects. Eight-mm diameter cores of normal and cancerous tissue were taken from radical prostatectomy specimens according to needle biopsy maps and gross analysis. Using an automated Krumdieck microtome, the cores were cut into 300 µm thick slices. Slices from the cored section were evaluated by hematoxylin and eosin (H&E) staining to verify the histology of the slices neighboring those used for metabolic labeling. The slices were cultured on titanium screens in 6-well culture plates containing 2.5 mL of supplemented PFMR-4A medium with 50 nM R1881<sup>21</sup> and 50 µM of monosaccharide (Ac<sub>4</sub>ManNAc, Ac<sub>4</sub>ManNAz, or Ac<sub>4</sub>ManNAI). The plates were set on a rotating platform at a 30 degree angle in a standard tissue culture incubator. The angled rotation at 1 rpm allowed intermittent submersion of the tissue slices in the medium, permitting optimal nutrient and gas diffusion throughout the tissue. Each day, the conditioned media were removed and stored at -80 °C and replaced with fresh media. After 3 days, the media were removed and the slices were washed with phosphate buffered saline (PBS) prior to being snap-frozen in liquid nitrogen.

**Preparation of prostate tissue whole cell lysates.** Prostate tissue slice cultures were lysed in 1 mL of lysis buffer containing 1% Triton X-100, 20 mM Tris pH 7.4, 300 mM NaCl, and protease inhibitors (inhibitor cocktail III from Calbiochem). While the tissue was cooled on ice, pulverization was performed using a Tissue Tearor (Biospec Products model #780CL-04) on setting 2, with cycles of 20 sec on followed by 20 sec off, 2 min total time. Samples underwent sonication for 1 min total time with cycles of 10 sec on and 10 sec off at 2.0 V setting. Cell surface glycoproteins were collected in the supernatant after centrifugation at 10,000 rpm for 10 min at 4 °C. The supernatant was collected and a bicinchoninic acid (BCA) assay (Thermo Fisher Scientific) was performed to determine protein concentration.

**Labeling glycoproteins by biotin-alkyne or biotin-azide via copper (I) catalyzed azide-alkyne [3+2] cycloaddition (CuAAC) reaction.** Lysate was reacted in the presence of 1 mM CuSO<sub>4</sub>, 5 mM freshly prepared sodium ascorbate and 100 mM tris[(1-benzyl-1H-1,2,3-triazol-4-yl)methyl]amine (TBTA) (Sigma-Aldrich) and 25 mM biotin probe (Invitrogen Life Sciences). Samples were rotated for 1 hour at RT. The reaction was quenched with 10 mM ethylenediaminetetraacetic acid (EDTA).

**Immunoblotting.** Following preparation and protein concentration normalization by BCA assay, samples were separated by standard SDS-PAGE (Bio-Rad, Criterion system), transferred onto nitrocellulose, blocked in 5% bovine serum albumin (Sigma) in PBS with

0.1% Tween-20, and analyzed by standard enhanced chemiluminescence immunoblotting methods (Pierce). Monoclonal mouse anti-biotin HRP reagent (Jackson ImmnoResearch product #200-032-211) was diluted 1:100,000 in blocking buffer.

**Cell surface glycoprotein capture and MS analysis.** Triton X-100 stock solution diluted to 10% in PBS was added to TSC lysate for 1% final concentration and samples were rotated for 1 h at RT. Samples were then filtered through a PD-10 desalting column (GE Healthcare Life Sciences) and eluted with 3.5 mL PBS. SDS (10%) was added for final concentration of 0.5% SDS and samples were boiled at 90 °C for 8 min. Samples were cooled on ice for 5 min and an additional 8.5 mL of PBS and 100 µL of avidin slurry (Sigma, CAS: 1405-69-2) were added and rotated at RT for 1 h. Beads were concentrated by centrifugation at 1,400 rpm, 3 min at 4 °C, supernatant was removed and beads were transferred to a washed biospin column (Bio Rad Life Sciences) on a vacuum manifold. Beads were washed twice with 1 mL PBS, once with 1 mL 0.2% SDS/PBS, once with 1 mL fresh 6 M urea and twice with 1 mL PBS. Freshly prepared 6 M urea (400 µL) and 20 µL 100 mM tris(2-carboxyethyl)phosphine (TCEP) was delivered and sample was rotated for 30 min at RT. Freshly prepared 20 mL of 200 µM iodoacetamide was delivered and the sample was wrapped in foil and rotated for 30 min at RT. Beads were then washed 3 times with 1 mL of PBS and transferred to an RNase-free microcentrifuge tube with 2 washes of 300 µL PBS. Beads were concentrated by centrifugation at 6000 rpm, 3 min and supernatant was removed. Freshly made 2 M urea (200 µL) was added and trypsin digestion (Promega Corporation, # V511) was performed overnight in a bench top shaker at 37 °C. The next morning, the beads were pelleted at 6,000 rpm for 3 min. The supernatant was collected and the beads washed with an additional 100 µL of PBS. LC-MS grade formic acid (16 mL) was added and the resulting peptide mixtures were solid-phase extracted with SPEC PT C18 tips (Agilent, #A57203) according to the manufacturer's instructions and stored at -80°C.

**Mass Spectrometry (MS).** Released peptides were analyzed by reversed-phase nanoflow liquid chromatography coupled (Thermo Dionex UltiMate3000 RSLC) that was connected in-line with a 15 cm C18 column (Thermo, PM100) to a Thermo LTQ Orbitrap XL mass spectrometer equipped with a nanoelectrospray ionization (nanoESI) source. Full-scan mass spectra were acquired in the positive-ion mode over the range  $m/z = 400-2,000$  using the Orbitrap mass analyzer, in profile format, with a mass resolution setting of 60,000. In the data-dependent mode, the eight most intense ions exceeding an intensity threshold of 50,000 counts were selected from each full-scan mass spectrum for tandem mass spectrometry (MS/MS, i.e., MS2) analysis using collision-induced dissociation (CID). MS2 spectra were acquired using the linear ion trap or the Orbitrap analyzer in centroid format. Data acquisition was controlled using Xcalibur software (version 2.0.7, Thermo). The raw data are available upon request.

**Data Analysis.** LC-MS/MS data was searched using the SequestHT searching algorithm in the Proteome Discover 1.4 software against the human-specific SwissProt-reviewed database downloaded 18 July 2014 with a 1% false discovery rate (FDR).

**Prostate adenocarcinoma tissue slice fluorescence microscopy.** Frozen prostate TSCs were placed on slides mounted with 4-tissue culture wells and allowed to thaw for 10 min. Tissue slices were then washed with DPBS + 1% FBS (2 x 0.8 mL), followed by incubation with or without DIBAC-647 (25 µM) in DMEM media for 1 h at 4 °C. Tissues slices were subsequently washed with DPBS + 1% FBS (10 x 0.8 mL) and fixed with 4%

paraformaldehyde in PBS (0.4 mL) for 5 min at 4 °C and 20 min at rt and washed with DPBS (4 x 0.4 mL). To demonstrate azide labeling was cell surface-specific, fixed TSCs were blocked in 10% BSA for 1 h and then incubated with CD47 (1:1000, abcam #ab3283) for 1 h RT. TSCs were washed (3 x 0.8 mL) and CD47-labeled proteins were visualized with goat anti-mouse conjugated with Alexa Fluor 488 (1:1000, Abcam #ab150113) for 1 h RT. The tissue slices were washed with DPBS (3 x 0.8 mL) and transferred to a concave microscope slide. DAPI mounting solution (~20  $\mu$ L) was delivered and a glass coverslip was used to seal the slide, and the tissue slices were imaged.

## II. Supplementary Figures

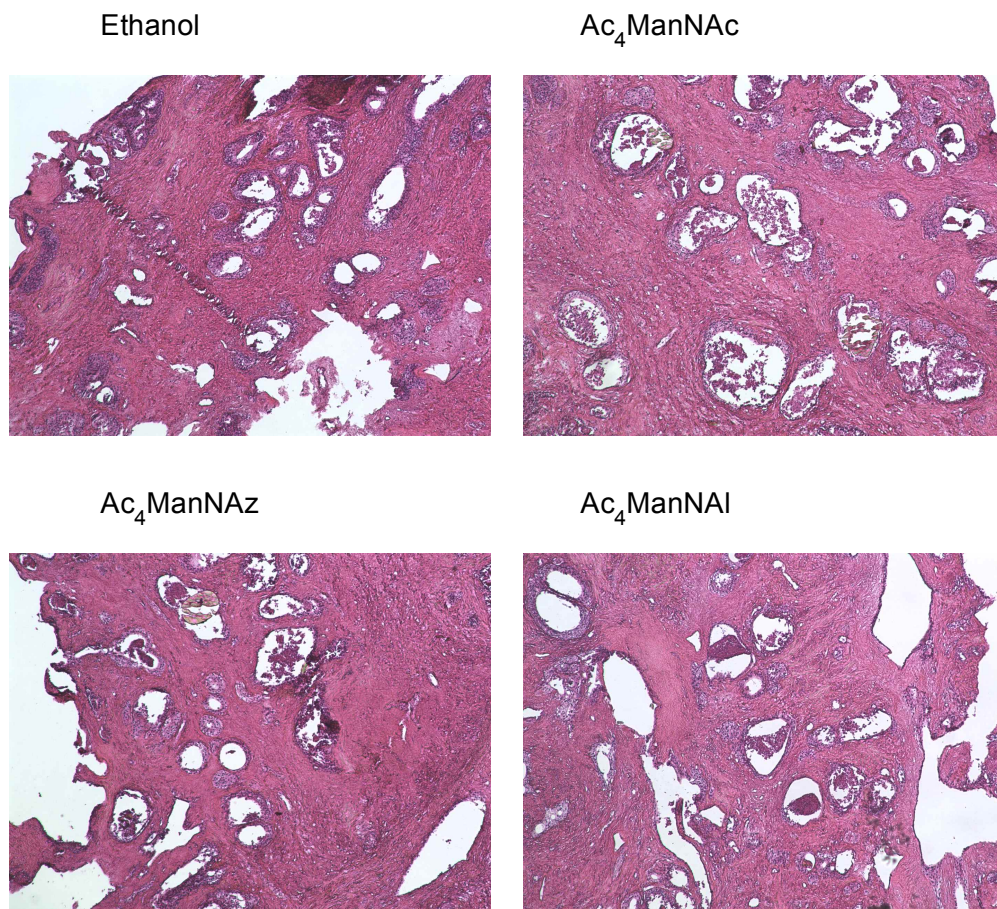

**SI Figure S1.** Histological of prostate tissue slice cultures (TSCs) by hematoxylin and eosin (H&E) staining. TSCs incubated with either ethanol, Ac<sub>4</sub>ManNAc, Ac<sub>4</sub>ManNAz or Ac<sub>4</sub>ManNAI.

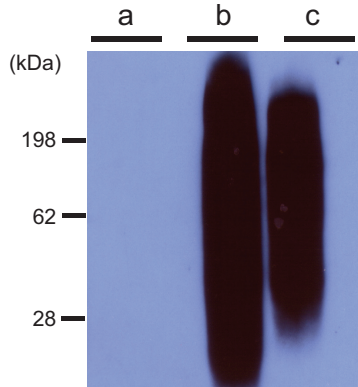

**SI Figure S2.** Western blot analysis of human prostate TSCs lysate administered Ac<sub>4</sub>ManNAc, Ac<sub>4</sub>ManNAz, or Ac<sub>4</sub>ManNAI. (a) Ac<sub>4</sub>ManNAc and (b) Ac<sub>4</sub>ManNAz reacted with biotin-alkyne under copper-catalyzed azide-alkyne [3+2] cycloaddition (CuAAAC) and (c) Ac<sub>4</sub>ManNAI reacted with biotin-azide under CuAAC conditions. Strong azide and alkyne labeling was observed. Equal protein was loaded as calculated by bicinchoninic acid (BCA) assay.

**SI Table S1.** Proteins enriched in cancer (n=8) versus normal (n=8) prostate tissue datasets.

| Gene Name | Protein Name                                        | Fold [CA/N] |
|-----------|-----------------------------------------------------|-------------|
| C4B       | Complement C4-B                                     | 48          |
| C4A       | Complement C4-A                                     | 24.7        |
| DPP2      | Dipeptidyl peptidase 2                              | 23.0        |
| VDAC      | Voltage-dependent anion-selective channel protein 1 | 22.5        |
| RAB1C     | Putative Ras-related protein Rab-1C                 | 18.0        |
| K1324     | Estrogen-induced gene 121                           | 18.0        |
| EZRI      | Ezrin                                               | 17.0        |
| APOE      | Apolipoprotein E                                    | 10.0        |
| PTPR      | Receptor-type tyrosine-protein phosphatase kappa    | 9.0         |
| GDF15     | Growth/differentiation factor 15                    | 8.3         |
| NUCB1     | Nucleobindin-1                                      | 7.0         |
| VAPA      | Plasmalemma vesicle-associated protein              | 7.0         |
| TRY3      | Trypsin-3                                           | 7.0         |
| FOLH      | Glutamate carboxypeptidase 2                        | 6.5         |
| DRA       | HLA class II histocompatibility antigen             | 6.0         |
| ATPA      | ATP synthase subunit alpha                          | 5.4         |
| CATB      | Cathepsin B                                         | 5.0         |
| GLCM      | Glucosylceramidase                                  | 5.0         |
| T179      | Transmembrane protein 179B                          | 5.0         |
| AMPN      | Aminopeptidase N (CD13)                             | 4.8         |
| ENPL      | Endoplasmic (Tumor rejection antigen 1)             | 4.6         |
| CERU      | Ceruloplasmin                                       | 4.5         |
| GGT3      | Putative $\gamma$ -glutamyltranspeptidase 3         | 4.3         |
| PPAP      | Prostatic acid phosphatase                          | 4.1         |

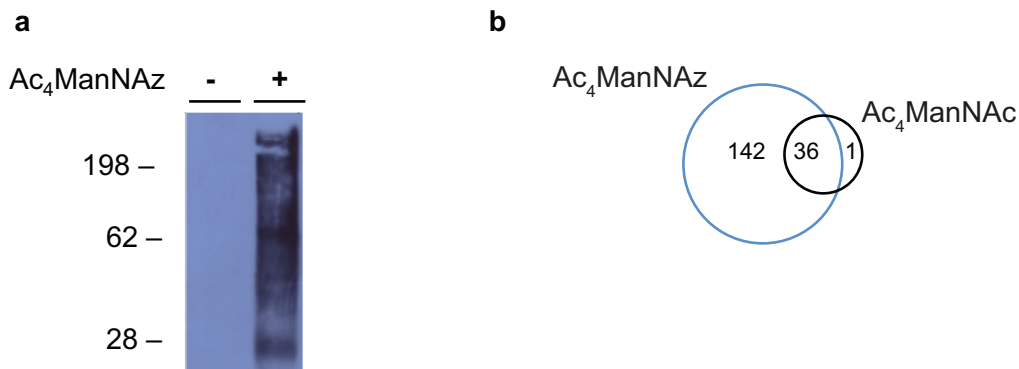

**SI Figure S3:** Labeled glycoproteins from conditioned media administered  $Ac_4ManNAz$  or  $Ac_4ManNAc$ . (a) The conditioned media from prostate TSC incubated with  $Ac_4ManNAz$  or  $Ac_4ManNAc$  was collected and purified to remove excess sugar. Samples were treated with biotin-alkyne probe and analyzed by Western blot using an HRP-conjugated anti-biotin antibody. Strong azide labeling was observed over background. (b) Proteomic analysis revealed azide-dependent labeling.

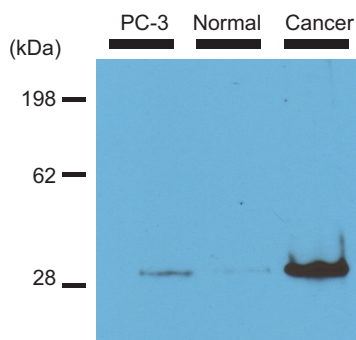

**SI Figure 4.** Voltage-dependent anion-selective channel 1 (encoded by the gene *VDAC1*) is overexpressed in human prostate cancer tissue. Lysate from normal and cancer human prostate TSCs and a prostate cell line, PC-3, lysate was probed with a  $\alpha$ -VDAC1 mAB. Equal protein was loaded as calculated by BCA assay.

## References

- [1] Laughlin, S. T.; Bertozzi, C. R. *Nat. Protocols* 2007, 2, 2930–2944.  
 [2] Chang, P.V.; Chen, X.; Smyrniotis, C.; Xenakis, A.; Hu, T.; Bertozzi, C.R.; Wu, P.; *Angew. Chem. Int. Ed.* 2009, 48, 4030-4033

**SI Table S2.** Proteomic dataset of proteins found in normal and cancer prostate tissue slice cultures (TSCs). Proteins found in prostate cancer (c1-8) and normal (n1-8) proteomic dataset. Columns include uniprot accession numbers (ACCN), gene names, protein names, Swiss-Prot databank annotations of glycosylation. The total number of identified peptide sequences (peptide spectrum matches) for the protein, including those redundantly identified.

| ACCN   | Gene Name | Protein Name                              | Annotated Glycosylated | N1 | N2 | N3 | N4 | N5 | N6 | N7 | N8  | C1 | C2 | C3 | C4 | C5 | C6 | C7 | C8 |
|--------|-----------|-------------------------------------------|------------------------|----|----|----|----|----|----|----|-----|----|----|----|----|----|----|----|----|
| P35749 | MYH11     | Myosin-11                                 |                        | 24 | 13 | 41 | 36 | 37 | 31 | 22 | 85  | 13 | 14 | 12 | 13 | 28 | 42 | 66 | 56 |
| P12111 | COL6A3    | Collagen alpha-3                          | N-linked, O-linked     | 11 | 6  | 35 | 28 | 23 | 21 | 2  | 102 | 4  | 8  | 3  | 11 | 5  | 28 | 40 | 67 |
| P13645 | KRT10     | Keratin, type I cytoskeletal 10           |                        | 15 | 14 | 23 | 19 | 10 | 1  | 27 | 42  | 16 | 14 | 12 | 13 | 17 | 42 | 45 | 38 |
| P04264 | KRT1      | Keratin, type II cytoskeletal 1           |                        | 15 | 12 | 23 | 14 | 11 | 8  | 30 | 35  | 25 | 15 | 14 | 13 | 15 | 41 | 45 | 37 |
| P21333 | FLNA      | Filamin-A                                 |                        | 18 | 4  | 20 | 16 | 27 | 4  | 11 | 16  |    | 18 | 9  | 9  | 19 | 5  | 6  | 57 |
| P35908 | KRT2      | Keratin, type II cytoskeletal 2 epidermal |                        | 9  | 14 | 19 | 11 | 10 | 4  | 25 | 20  | 16 | 8  | 8  | 11 | 9  | 24 | 31 | 26 |
| Q7Z5K2 | WAPL      | Wings apart-like protein homolog          |                        | 22 | 2  | 35 | 11 | 29 |    |    |     | 25 | 28 | 27 | 3  | 20 |    |    |    |
| P05556 | ITGB1     | Integrin beta-1                           | N-linked               | 10 | 7  | 11 | 15 | 9  | 9  | 14 | 22  | 11 | 11 | 13 | 8  | 10 | 24 | 26 | 22 |
| P18206 | VCL       | Vinculin                                  |                        | 7  | 7  | 24 | 7  | 21 | 11 | 7  | 9   |    | 8  | 6  | 17 | 14 | 4  | 1  | 45 |
| P35527 | KRT9      | Keratin, type I cytoskeletal 9            |                        | 9  | 3  | 13 | 5  | 8  | 3  | 14 | 35  | 19 | 11 | 13 | 4  | 11 | 25 | 30 | 31 |
| P01011 | SERPINA3  | Alpha-1-antichymotrypsin                  | N-linked               | 12 | 12 | 5  | 6  | 6  | 7  | 17 | 15  | 15 | 8  | 11 | 17 | 21 | 36 | 48 | 12 |
| P17301 | ITGA2     | Integrin alpha-2                          | N-linked               | 10 | 8  | 11 | 10 | 7  | 11 | 7  | 15  | 3  | 8  | 9  | 6  | 4  | 18 | 21 | 12 |
| P17661 | DES       | Desmin                                    |                        | 2  | 1  | 10 | 7  | 12 | 9  | 7  | 29  | 4  | 6  | 2  | 3  | 7  | 12 | 11 | 19 |
| P24821 | TNC       | Tenascin                                  | N-linked               | 8  | 12 | 10 | 8  | 8  | 7  | 6  | 17  | 2  | 1  | 2  | 6  | 7  | 21 | 19 | 4  |
| P06756 | ITGAV     | Integrin alpha-V                          | N-linked               | 7  | 10 | 10 | 10 | 7  | 10 | 9  | 10  | 2  | 6  | 7  | 8  | 12 | 14 | 16 | 9  |
| P51884 | LUM       | Lumican                                   | N-linked               | 9  | 6  | 8  | 9  | 4  | 5  | 8  | 22  | 2  | 9  | 9  | 6  | 8  | 8  | 10 | 22 |
| Q01995 | TAGLN     | Transgelin                                |                        | 7  | 5  | 9  | 6  | 6  | 6  | 19 | 10  | 4  | 9  | 10 | 6  | 7  | 16 | 18 | 22 |
| P63267 | ACTG2     | Actin, gamma-enteric smooth muscle        |                        | 8  | 5  | 8  | 6  | 7  | 4  | 5  | 24  |    | 5  | 5  | 5  | 5  |    |    | 31 |
| P08195 | SLC3A2    | 4F2 cell-surface antigen heavy chain      | N-linked               | 7  | 9  | 7  | 7  | 5  | 7  | 11 | 13  | 2  | 5  | 6  | 6  | 6  | 23 | 26 | 27 |
| P07093 | SERPINE2  | Glia-derived nexin                        | N-linked               | 6  | 6  | 6  | 8  | 1  | 7  | 12 | 14  | 11 | 5  | 5  | 4  | 8  | 6  | 9  | 9  |
| Q9Y490 | TLN1      | Talin-1                                   |                        | 7  | 4  | 20 | 13 | 11 | 2  | 1  |     |    | 10 | 6  | 11 | 6  |    |    | 7  |
| P08758 | ANXA5     | Annexin A5                                |                        | 5  | 3  | 10 | 8  | 2  | 6  | 5  | 18  | 3  | 7  | 6  | 4  | 4  | 13 | 19 | 21 |
| P35579 | MYH9      | Myosin-9                                  |                        |    |    | 11 | 9  | 7  | 10 |    | 20  |    | 3  |    | 1  | 15 |    |    | 24 |

| ACCN   | Gene Name | Protein Name                                        | Annotated Glycosylated | N1 | N2 | N3 | N4 | N5 | N6 | N7 | N8 | C1 | C2 | C3 | C4 | C5 | C6 | C7 | C8 |
|--------|-----------|-----------------------------------------------------|------------------------|----|----|----|----|----|----|----|----|----|----|----|----|----|----|----|----|
| P68871 | HBB       | Hemoglobin subunit beta                             | N-linked               | 2  | 4  | 10 | 8  | 5  | 4  | 10 | 12 | 3  | 2  | 3  | 5  | 10 | 24 | 25 | 22 |
| P23229 | ITGA6     | Integrin alpha-6                                    | N-linked               | 5  | 9  | 8  | 7  | 6  | 5  | 7  | 6  | 2  | 2  | 1  | 5  | 2  | 7  | 8  |    |
| P60660 | MYL6      | Myosin light polypeptide 6                          |                        | 7  | 1  | 5  | 7  | 3  | 2  | 7  | 20 | 4  | 6  | 4  | 3  | 4  | 7  | 8  | 10 |
| P09758 | TACSTD2   | Tumor-associated calcium signal transducer 2        | N-linked               | 3  | 6  | 7  | 7  | 3  | 6  | 11 | 5  | 3  | 4  | 4  | 6  | 6  | 13 | 18 | 11 |
| P08133 | ANXA6     | Annexin A6                                          |                        |    | 1  | 10 | 4  | 5  | 1  |    | 26 |    |    |    |    |    |    |    | 9  |
| Q08380 | LGALS3BP  | Galectin-3-binding protein                          | N-linked               | 11 | 4  | 5  | 7  | 4  | 2  | 7  | 6  | 8  | 11 | 14 | 3  | 8  | 15 | 18 | 6  |
| Q09666 | AHNAK     | Neuroblast differentiation-associated protein AHNAK |                        | 1  | 6  | 9  | 12 | 5  | 3  | 7  | 2  | 8  | 6  | 7  | 11 | 13 | 5  | 7  | 4  |
| Q16853 | AOC3      | Membrane primary amine oxidase                      | N-linked, O-linked     |    | 2  | 10 | 5  | 2  | 3  | 11 | 12 | 4  | 2  |    | 3  | 6  | 7  | 10 | 11 |
| P13647 | KRT5      | Keratin, type II cytoskeletal 5                     |                        |    | 4  | 8  | 3  | 6  | 2  | 11 | 9  | 9  | 2  |    | 5  | 5  | 10 | 10 | 9  |
| Q13740 | ALCAM     | CD166 antigen                                       | N-linked               | 5  | 5  | 3  | 5  | 5  | 4  | 8  | 8  | 8  | 7  | 8  | 7  | 10 | 20 | 23 | 19 |
| P02768 | ALB       | Serum albumin                                       | N-linked               | 1  | 2  | 6  | 4  | 4  | 3  | 8  | 14 | 5  | 1  | 1  | 3  | 5  | 12 | 13 | 15 |
| P09493 | TPM1      | Tropomyosin alpha-1 chain                           |                        | 4  | 3  | 8  | 6  | 5  | 3  | 8  | 5  | 3  | 6  | 5  | 3  | 7  | 10 | 9  | 13 |
| P10909 | CLU       | Clusterin                                           | N-linked               | 4  | 3  | 7  | 5  | 6  | 3  | 9  | 5  | 5  | 3  | 4  | 4  | 8  | 12 | 14 | 9  |
| P60709 | ACTB      | Actin, cytoplasmic 1                                |                        | 5  | 5  | 6  | 4  | 5  |    |    | 17 | 3  | 6  | 3  | 5  | 6  | 23 | 29 | 25 |
| P02533 | KRT14     | Keratin, type I cytoskeletal 14                     |                        | 1  | 7  | 8  | 4  |    |    | 14 | 6  | 11 | 3  |    | 5  | 3  | 8  | 9  | 11 |
| Q15758 | SLC1A5    | Neutral amino acid transporter B                    | N-linked               | 6  | 3  | 4  | 7  | 2  | 6  | 5  | 7  | 7  | 6  | 6  | 2  | 3  | 10 | 11 | 9  |
| P11142 | HSPA8     | Heat shock cognate 71 kDa protein                   |                        | 6  | 6  | 4  | 3  | 6  | 5  | 4  | 4  |    |    |    | 7  | 3  | 14 | 14 | 12 |
| P11021 | HSPA5     | 78 kDa glucose-regulated protein                    |                        | 3  | 9  | 9  | 3  |    | 4  | 4  | 5  | 2  | 5  | 6  | 10 | 11 | 19 | 23 | 29 |
| P51888 | PRELP     | Prolargin                                           | N-linked               | 3  | 2  | 2  | 5  | 3  | 2  |    | 20 |    | 1  |    | 3  | 5  | 8  | 16 | 25 |
| P25311 | AZGP1     | Zinc-alpha-2-glycoprotein                           | N-linked               | 3  | 5  | 3  | 3  | 1  | 4  | 13 | 4  | 4  | 2  | 2  | 3  | 5  | 22 | 30 | 14 |
| P05362 | ICAM1     | Intercellular adhesion molecule 1                   | N-linked               | 6  | 4  | 5  | 4  | 3  | 2  | 6  | 4  | 6  | 7  | 7  | 5  | 4  | 13 | 16 | 17 |
| P08779 | KRT16     | Keratin, type I cytoskeletal 16                     |                        |    | 7  | 7  |    |    |    | 14 | 6  | 8  |    |    | 5  |    | 8  | 9  | 11 |
| P12109 | COL6A1    | Collagen alpha-1                                    | N-linked               | 1  | 1  | 3  | 1  | 3  | 1  | 1  | 23 |    |    |    | 1  | 3  | 2  | 8  | 8  |
| P08648 | ITGA5     | Integrin alpha-5                                    | N-linked               | 1  | 5  | 5  | 4  | 5  | 3  | 6  | 4  | 4  | 4  | 5  | 3  | 4  | 16 | 11 | 16 |
| P62805 | HIST1H4A  | Histone H4                                          |                        | 2  | 1  | 5  | 4  | 2  | 4  | 4  | 11 | 2  | 3  | 2  | 3  | 3  | 7  | 10 | 10 |
| P04259 | KRT6B     | Keratin, type II cytoskeletal 6B                    |                        | 4  | 5  |    |    |    |    | 12 | 11 | 11 |    |    | 5  | 5  | 14 |    |    |
| P05787 | KRT8      | Keratin, type II cytoskeletal 8                     |                        |    |    | 6  | 5  | 2  | 4  | 8  | 7  |    |    |    | 7  | 5  | 16 | 20 | 33 |



| ACCN   | Gene Name | Protein Name                                              | Annotated Glycosylated | N1 | N2 | N3 | N4 | N5 | N6 | N7 | N8 | C1 | C2 | C3 | C4 | C5 | C6 | C7 | C8 |
|--------|-----------|-----------------------------------------------------------|------------------------|----|----|----|----|----|----|----|----|----|----|----|----|----|----|----|----|
| P07355 | ANXA2     | Annexin A2                                                |                        | 4  | 3  | 7  | 5  | 3  | 3  |    | 7  |    | 5  | 5  |    |    | 24 | 32 | 18 |
| P26006 | ITGA3     | Integrin alpha-3                                          | N-linked               | 5  | 3  | 3  | 5  | 1  | 3  | 4  | 8  | 2  | 2  | 2  | 2  | 1  | 6  | 6  |    |
| O75976 | CPD       | Carboxypeptidase D                                        | N-linked               | 1  | 10 | 2  | 9  | 2  | 5  | 1  | 1  | 3  | 5  | 2  | 11 | 11 | 19 | 25 | 10 |
| P15144 | ANPEP     | Aminopeptidase N                                          | N-linked               | 6  | 10 |    | 2  |    | 1  | 12 |    | 15 | 3  | 4  | 18 | 10 | 51 | 56 | 24 |
| P62736 | ACTA2     | Actin, aortic smooth muscle                               |                        |    |    |    |    |    |    | 5  | 26 |    |    |    |    |    | 23 | 32 | 33 |
| P02788 | LTF       | Lactotransferrin                                          | N-linked               | 9  | 12 | 1  | 2  |    |    | 4  | 2  | 1  |    | 1  | 25 | 6  |    |    |    |
| P63104 | YWHAZ     | 14-3-3 protein zeta/delta                                 |                        | 5  | 3  | 7  | 6  | 3  | 4  |    | 2  | 3  | 8  | 6  | 4  | 6  | 10 | 11 | 17 |
| P11279 | LAMP1     | Lysosome-associated membrane glycoprotein 1               | N-linked, O-linked     | 4  | 2  | 4  | 3  | 2  | 3  | 7  | 4  | 3  | 4  | 3  | 4  | 4  | 7  | 8  | 9  |
| P68032 | ACTC1     | Actin, alpha cardiac muscle 1                             |                        |    |    |    |    |    |    | 5  | 24 |    |    |    |    |    | 23 |    | 33 |
| Q14108 | SCARB2    | Lysosome membrane protein 2                               | N-linked               | 2  | 3  | 4  | 5  | 1  | 3  | 7  | 4  | 3  | 4  | 4  | 2  | 5  | 16 | 15 | 9  |
| P02545 | LMNA      | Prelamin-A/C [Cleaved into: Lamin-A/C                     |                        | 3  | 2  | 3  | 5  | 4  | 7  | 2  | 2  | 2  | 3  | 4  | 6  | 4  | 4  | 12 | 35 |
| P02751 | FN1       | Fibronectin                                               | N-linked, O-linked     | 1  | 6  | 6  | 4  | 8  |    |    | 1  |    | 1  | 1  | 10 | 8  |    | 1  | 1  |
| P07951 | TPM2      | Tropomyosin beta chain                                    |                        |    | 3  | 5  | 7  |    | 3  | 6  | 2  |    |    | 5  | 3  | 5  | 8  | 5  | 12 |
| P11047 | LAMC1     | Laminin subunit gamma-1                                   | N-linked               | 1  |    | 3  | 3  | 2  | 5  |    | 12 |    |    |    | 1  | 2  |    |    | 2  |
| P54709 | ATP1B3    | Sodium/potassium-transporting ATPase subunit beta-3       | N-linked               | 3  | 2  | 3  | 2  | 3  | 2  | 4  | 7  | 1  | 1  | 2  | 2  | 2  | 8  | 10 | 6  |
| P08962 | CD63      | CD63 antigen                                              | N-linked               | 2  | 1  | 3  | 3  | 1  | 2  | 5  | 8  | 3  | 2  | 3  | 2  | 3  | 8  | 12 | 8  |
| P35613 | BSG       | Basigin                                                   | N-linked               | 4  | 3  | 4  | 5  | 1  | 2  | 5  | 1  | 3  | 4  | 4  | 2  | 5  | 5  | 10 | 6  |
| Q06830 | PRDX1     | Peroxiredoxin-1                                           |                        | 1  | 2  | 3  | 3  | 2  | 3  | 7  | 4  | 2  | 2  | 2  | 3  | 3  | 6  | 8  | 9  |
| Q8NBJ4 | GOLM1     | Golgi membrane protein 1                                  | N-linked               |    | 4  | 2  | 3  | 1  | 4  | 11 |    | 5  | 6  | 8  | 7  | 7  | 6  | 14 | 2  |
| P05026 | ATP1B1    | Sodium/potassium-transporting ATPase subunit beta-1       | N-linked               | 4  | 1  | 3  | 3  | 2  | 2  | 3  | 6  | 1  | 4  | 3  | 2  | 3  | 3  | 4  | 2  |
| P05090 | APOD      | Apolipoprotein D                                          | N-linked               | 1  | 4  | 3  | 2  | 1  | 4  | 5  | 4  | 3  | 4  | 5  | 3  | 3  | 7  | 7  | 7  |
| P06733 | ENO1      | Alpha-enolase                                             |                        | 4  | 6  | 5  | 3  | 2  | 3  |    | 1  | 1  | 4  | 4  | 6  | 3  | 12 | 24 | 10 |
| Q14126 | DSG2      | Desmoglein-2                                              | N-linked               | 4  | 2  | 4  | 6  | 3  | 1  | 2  | 2  | 2  | 7  | 5  | 3  | 3  | 6  | 4  |    |
| Q96KK5 | HIST1H2AH | Histone H2A type 1-H                                      |                        | 2  | 1  | 2  | 3  | 3  | 2  | 2  | 9  |    | 2  | 2  | 2  | 2  | 7  | 8  | 8  |
| P06731 | CEACAM5   | Carcinoembryonic antigen-related cell adhesion molecule 5 | N-linked               | 3  |    | 4  | 4  | 3  | 3  | 3  | 3  | 3  | 2  | 2  |    |    | 4  | 5  | 2  |
| P08473 | MME       | Neprilysin                                                | N-linked               |    | 1  | 2  | 7  |    | 2  | 11 |    | 2  |    |    | 1  | 8  | 7  | 8  | 4  |
| P12110 | COL6A2    | Collagen alpha-2                                          | N-linked               |    |    | 2  | 3  | 3  | 2  |    | 13 |    |    |    |    | 2  | 3  | 4  | 6  |

| ACCN   | Gene Name | Protein Name                                   | Annotated Glycosylated | N1 | N2 | N3 | N4 | N5 | N6 | N7 | N8 | C1 | C2 | C3 | C4 | C5 | C6 | C7 | C8 |
|--------|-----------|------------------------------------------------|------------------------|----|----|----|----|----|----|----|----|----|----|----|----|----|----|----|----|
| P13473 | LAMP2     | Lysosome-associated membrane glycoprotein 2    | N-linked, O-linked     | 2  | 1  | 3  | 4  | 2  | 3  | 3  | 5  | 2  | 2  | 2  | 1  | 5  | 6  | 6  | 6  |
| P27348 | YWHAQ     | 14-3-3 protein theta                           |                        | 5  |    | 4  | 4  |    | 4  | 3  | 3  | 3  | 5  | 5  |    |    |    |    | 8  |
| P27701 | CD82      | CD82 antigen                                   | N-linked               | 4  | 1  | 5  | 4  |    |    | 8  | 1  | 5  | 2  | 3  | 1  | 4  |    | 1  |    |
| P68133 | ACTA1     | Actin, alpha skeletal muscle                   |                        |    |    |    |    |    |    | 5  | 18 |    |    |    |    |    | 23 |    | 27 |
| Q13641 | TPBG      | Trophoblast glycoprotein                       | N-linked               | 3  | 2  | 2  | 5  | 1  | 2  | 2  | 6  | 1  | 1  | 2  | 2  | 2  | 4  | 5  | 7  |
| P04792 | HSPB1     | Heat shock protein beta-1                      |                        | 3  | 2  | 2  | 2  | 2  | 1  | 4  | 6  |    | 5  | 3  | 1  | 2  | 6  | 8  | 7  |
| P16284 | PECAM1    | Platelet endothelial cell adhesion molecule    | N-linked               | 4  | 2  | 5  | 4  |    | 1  | 2  | 4  | 2  | 5  | 5  | 1  | 6  | 4  | 8  | 9  |
| P21810 | BGN       | Biglycan                                       | N-linked, O-linked     | 2  | 1  | 1  | 1  | 3  | 1  | 2  | 11 | 1  | 1  | 1  | 1  | 2  | 5  | 10 | 17 |
| P51911 | CNN1      | Calponin-1                                     |                        | 2  | 3  | 4  | 4  | 4  |    | 2  | 3  |    | 3  | 3  | 4  | 6  | 2  | 5  | 6  |
| Q05707 | COL14A1   | Collagen alpha-1                               | N-linked, O-linked     | 1  |    | 9  | 2  | 2  | 2  |    | 6  |    |    |    |    | 3  |    |    | 12 |
| P20774 | OGN       | Mimecan                                        | N-linked, O-linked     | 2  |    | 2  | 2  | 1  | 3  |    | 11 |    | 1  | 1  |    | 1  |    |    | 4  |
| P24844 | MYL9      | Myosin regulatory light polypeptide 9          |                        |    | 3  | 5  | 4  |    |    | 3  | 6  |    |    |    | 3  | 4  | 4  | 4  | 6  |
| P68104 | EEF1A1    | Elongation factor 1-alpha 1                    |                        | 4  | 2  | 2  | 2  | 2  | 1  | 3  | 5  | 2  | 2  | 1  | 1  | 3  | 12 | 17 | 8  |
| Q13510 | ASAH1     | Acid ceramidase                                | N-linked               | 1  | 4  | 3  | 2  | 2  | 2  | 5  | 2  | 6  | 1  | 3  | 7  | 3  | 12 | 11 | 8  |
| Q92542 | NCSTN     | Nicastrin                                      | N-linked               | 1  | 3  | 2  | 5  | 1  | 3  | 5  | 1  | 4  | 2  | 5  | 3  | 8  | 9  | 12 | 3  |
| Q9BQE3 | TUBA1C    | Tubulin alpha-1C chain                         |                        |    | 1  | 3  | 1  | 2  | 1  |    | 13 |    |    |    | 1  | 1  | 15 | 20 | 11 |
| O60814 | HIST1H2BK | Histone H2B type 1-K                           | O-linked               | 1  | 2  | 4  | 2  | 3  | 3  | 1  | 4  |    | 1  | 1  | 1  | 3  |    | 3  | 5  |
| P01033 | TIMP1     | Metalloproteinase inhibitor 1                  | N-linked               | 3  | 3  | 2  | 2  | 2  | 1  | 4  | 3  | 2  | 2  | 2  | 2  | 2  | 4  | 4  | 4  |
| P02538 | KRT6A     | Keratin, type II cytoskeletal 6A               |                        |    |    | 11 |    |    |    |    | 9  |    |    |    |    |    |    |    |    |
| P02794 | FTH1      | Ferritin heavy chain                           |                        |    | 1  | 4  | 3  |    | 2  | 4  | 6  |    | 2  | 1  | 2  | 3  | 9  | 10 | 14 |
| P05121 | SERPINE1  | Plasminogen activator inhibitor 1              | N-linked               | 2  | 5  | 5  | 2  | 2  | 1  | 3  |    |    | 1  | 1  | 1  | 1  | 2  | 3  | 4  |
| P08670 | VIM       | Vimentin                                       | O-linked               |    |    | 3  | 2  | 2  | 2  |    | 11 |    |    |    | 2  | 2  | 10 | 13 | 21 |
| P10809 | HSPD1     | 60 kDa heat shock protein, mitochondrial       |                        |    | 1  | 6  | 5  | 2  | 2  |    | 4  | 2  | 4  | 4  | 8  | 11 | 19 | 24 | 29 |
| Q14CN2 | CLCA4     | Calcium-activated chloride channel regulator 4 | N-linked               | 4  | 1  | 4  | 4  | 2  | 3  | 2  |    | 1  |    |    | 1  |    |    |    |    |
| P07237 | P4HB      | Protein disulfide-isomerase                    |                        |    | 1  | 5  | 2  | 2  | 1  | 7  | 1  |    |    |    | 1  | 8  | 17 | 22 | 28 |
| P07339 | CTSD      | Cathepsin D                                    | N-linked, O-linked     | 3  | 6  | 1  | 5  | 1  | 2  |    | 1  | 4  | 3  | 4  | 6  | 3  | 12 | 13 | 4  |
| P0DMV8 | HSPA1A    | Heat shock 70 kDa protein 1A                   |                        |    | 6  |    | 4  | 5  | 2  |    | 2  |    |    |    | 5  |    | 10 | 15 | 11 |

| ACCN   | Gene Name | Protein Name                                              | Annotated Glycosylated | N1 | N2 | N3 | N4 | N5 | N6 | N7 | N8 | C1 | C2 | C3 | C4 | C5 | C6 | C7 | C8 |
|--------|-----------|-----------------------------------------------------------|------------------------|----|----|----|----|----|----|----|----|----|----|----|----|----|----|----|----|
| P0CG48 | UBC       | Polyubiquitin-C                                           |                        | 2  | 1  | 1  | 2  | 2  | 1  | 4  | 6  | 1  | 3  | 3  | 2  | 2  | 5  | 6  | 5  |
| P13688 | CEACAM1   | Carcinoembryonic antigen-related cell adhesion molecule 1 | N-linked               | 2  | 3  | 2  | 4  | 3  |    |    | 5  |    |    |    | 2  | 3  | 8  | 10 | 4  |
| P62258 | YWHAE     | 14-3-3 protein epsilon                                    |                        | 4  |    | 4  | 4  | 2  | 4  |    | 1  |    | 5  | 3  | 4  | 3  | 9  | 10 | 9  |
| P06753 | TPM3      | Tropomyosin alpha-3 chain                                 |                        | 2  |    | 5  | 5  |    | 2  | 4  |    | 3  | 5  | 5  | 2  | 6  |    | 4  | 5  |
| Q06323 | PSME1     | Proteasome activator complex subunit 1                    |                        | 1  | 1  | 4  | 5  |    | 3  | 4  |    | 1  | 4  | 3  | 4  | 6  | 5  | 7  | 2  |
| P23528 | CFL1      | Cofilin-1                                                 |                        | 3  | 3  | 2  | 3  | 1  | 1  | 2  | 2  | 1  | 4  | 4  | 3  | 3  | 7  | 8  | 4  |
| P32119 | PRDX2     | Peroxiredoxin-2                                           |                        | 1  |    | 2  | 2  | 2  | 2  | 5  | 3  | 1  | 2  | 2  | 3  | 2  |    | 4  | 3  |
| P43121 | MCAM      | Cell surface glycoprotein MUC18                           | N-linked               | 1  | 1  | 4  | 4  | 2  | 1  |    | 4  | 2  | 1  | 1  | 1  | 5  | 1  | 2  | 3  |
| P50895 | BCAM      | Basal cell adhesion molecule                              | N-linked               | 1  | 3  | 3  | 3  |    | 3  | 4  |    | 7  | 2  | 2  | 6  | 5  | 10 | 11 | 2  |
| P63261 | ACTG1     | Actin, cytoplasmic 2                                      |                        |    |    |    |    |    |    |    | 17 |    |    |    |    |    | 23 | 29 | 25 |
| Q03135 | CAV1      | Caveolin-1                                                |                        | 3  |    | 4  | 2  | 1  |    |    | 7  |    | 1  | 1  |    | 1  | 2  | 2  | 2  |
| P02786 | TFRC      | Transferrin receptor protein 1                            | N-linked, O-linked     | 3  | 4  | 2  | 4  |    | 3  |    |    | 2  | 5  | 5  | 3  |    | 3  | 4  | 10 |
| P04406 | GAPDH     | Glyceraldehyde-3-phosphate dehydrogenase                  |                        | 1  | 2  | 2  | 2  | 2  | 1  |    | 6  |    | 1  | 1  | 3  | 2  | 8  | 11 | 10 |
| P14625 | HSP90B1   | Endoplasmic                                               | N-linked               |    | 4  | 2  | 1  | 4  | 4  |    | 1  |    | 3  | 1  | 4  | 2  | 22 | 25 | 33 |
| P15586 | GNS       | N-acetylglucosamine-6-sulfatase                           | N-linked               | 2  | 3  | 2  | 3  |    | 1  | 5  |    | 2  | 3  | 4  | 3  | 5  | 9  | 10 | 4  |
| P18827 | SDC1      | Syndecan-1                                                | N-linked, O-linked     | 2  | 2  | 1  | 1  | 2  | 2  | 2  | 4  | 1  | 1  | 1  |    | 1  | 2  | 2  | 2  |
| P45880 | VDAC2     | Voltage-dependent anion-selective channel protein 2       |                        | 5  |    | 4  | 3  | 1  | 1  |    | 2  | 1  | 6  | 5  | 3  | 1  | 10 | 10 | 10 |
| P55268 | LAMB2     | Laminin subunit beta-2                                    | N-linked               |    |    | 2  | 4  | 1  | 1  |    | 8  |    |    |    |    | 1  |    |    |    |
| Q08722 | CD47      | Leukocyte surface antigen CD47                            | N-linked               | 1  | 1  | 1  |    | 1  | 1  | 7  | 4  | 2  | 1  | 1  | 1  | 1  | 6  | 7  | 6  |
| Q15746 | MYLK      | Myosin light chain kinase, smooth muscle                  |                        | 4  |    | 1  | 3  | 3  | 2  | 2  | 1  | 1  | 4  | 3  | 2  | 2  |    |    |    |
| P04179 | SOD2      | Superoxide dismutase [Mn], mitochondrial                  |                        |    | 1  | 2  | 3  |    | 3  | 4  | 2  | 2  |    |    | 2  | 3  | 9  | 14 | 7  |
| P08238 | HSP90AB1  | Heat shock protein HSP 90-beta                            | O-linked               | 2  | 3  | 2  | 2  |    | 3  | 2  | 1  |    |    |    | 3  | 2  | 13 | 24 | 15 |
| P08727 | KRT19     | Keratin, type I cytoskeletal 19                           |                        |    |    | 3  |    | 3  | 4  |    | 5  |    |    |    |    | 2  | 9  | 12 | 15 |
| P13796 | LCP1      | Plastin-2                                                 |                        | 2  | 3  | 5  | 3  | 1  | 1  |    |    |    | 2  | 4  | 3  | 3  | 6  | 7  | 11 |
| Q14BN4 | SLMAP     | Sarcolemmal membrane-associated protein                   |                        |    |    | 7  | 4  | 4  |    |    |    | 1  |    |    |    | 2  |    |    |    |
| Q9P2B2 | PTGFRN    | Prostaglandin F2 receptor negative regulator              | N-linked               | 1  | 4  | 3  | 3  | 1  | 1  | 2  |    | 3  |    |    | 2  | 2  | 7  | 9  | 1  |
| P15309 | ACPP      | Prostatic acid phosphatase                                | N-linked               | 1  | 2  | 2  | 2  | 3  | 1  | 3  |    | 2  | 1  |    | 3  | 5  | 19 | 28 | 13 |

| ACCN   | Gene Name     | Protein Name                                            | Annotated Glycosylated | N1 | N2 | N3 | N4 | N5 | N6 | N7 | N8 | C1 | C2 | C3 | C4 | C5 | C6 | C7 | C8 |
|--------|---------------|---------------------------------------------------------|------------------------|----|----|----|----|----|----|----|----|----|----|----|----|----|----|----|----|
| P16070 | CD44          | CD44 antigen                                            | N-linked, O-linked     | 3  | 2  | 1  | 2  | 1  | 1  | 2  | 2  | 4  | 2  | 2  | 1  | 1  | 4  | 6  | 6  |
| P21589 | NT5E          | 5'-nucleotidase                                         | N-linked               | 1  | 1  | 2  | 3  | 1  | 1  |    | 5  |    |    | 1  |    | 1  |    |    |    |
| P60174 | TPI1          | Triosephosphate isomerase                               |                        | 2  | 1  | 3  | 1  | 2  | 1  | 2  | 2  | 1  | 3  | 2  | 1  | 2  | 7  | 9  | 7  |
| Q07065 | CKAP4         | Cytoskeleton-associated protein 4                       |                        |    |    | 6  | 1  | 3  | 1  |    | 3  |    |    |    | 3  | 1  |    |    | 8  |
| P02792 | FTL           | Ferritin light chain                                    |                        | 1  | 1  | 2  | 1  | 2  | 1  | 3  | 2  | 1  | 1  | 1  | 1  | 1  | 6  | 8  | 10 |
| P09382 | LGALS1        | Galectin-1                                              |                        |    | 2  | 2  | 2  |    | 1  | 4  | 2  | 1  |    | 1  | 1  | 3  | 2  | 2  | 4  |
| P27824 | CANX          | Calnexin                                                |                        | 1  |    | 1  | 1  | 1  | 1  | 5  | 3  | 2  | 2  | 1  | 1  | 3  | 8  | 9  | 14 |
| P31947 | SFN           | 14-3-3 protein sigma                                    |                        |    |    | 4  | 4  |    | 4  |    | 1  |    |    |    |    |    | 6  |    | 7  |
| P68363 | TUBA1B        | Tubulin alpha-1B chain                                  |                        |    |    |    |    |    |    |    | 13 |    |    |    |    |    | 15 | 20 | 11 |
| P69905 | HBA1;         | Hemoglobin subunit alpha                                | N-linked               |    | 1  | 5  | 2  | 3  |    |    | 2  |    |    |    |    | 3  | 11 | 12 | 11 |
| Q6YHK3 | CD109         | CD109 antigen                                           | N-linked               | 2  | 3  | 2  | 2  |    | 2  |    | 2  |    | 2  | 1  | 2  |    |    |    |    |
| Q99715 | COL12A1       | Collagen alpha-1                                        | N-linked, O-linked     |    | 1  | 1  | 2  | 1  | 2  |    | 6  |    |    |    |    | 6  | 2  | 4  | 5  |
| P27105 | STOM          | Erythrocyte band 7 integral membrane protein            |                        |    | 1  | 4  | 4  | 1  |    |    | 2  |    |    |    | 3  |    |    |    |    |
| P30048 | PRDX3         | Thioredoxin-dependent peroxide reductase, mitochondrial |                        |    |    | 2  | 2  | 2  | 1  |    | 5  |    |    |    | 2  | 3  | 4  | 6  | 8  |
| P38646 | HSPA9         | Stress-70 protein, mitochondrial                        |                        |    | 6  | 1  |    | 2  | 1  | 1  | 1  |    |    |    | 7  | 4  | 4  | 5  | 4  |
| Q15063 | POSTN         | Periostin                                               | N-linked               |    |    | 2  | 3  |    | 2  |    | 5  |    | 1  | 1  |    |    |    |    | 24 |
| Q8IV08 | PLD3          | Phospholipase D3                                        | N-linked               | 2  | 2  | 1  | 3  |    | 2  | 2  |    | 1  | 2  | 1  | 2  | 1  | 4  | 4  |    |
| Q92520 | FAM3C         | Protein FAM3C                                           |                        | 1  | 4  |    | 2  | 1  | 1  | 2  | 1  | 1  | 1  | 1  | 2  | 3  |    |    |    |
| Q9UIQ6 | LNPEP         | Leucyl-cystinyl aminopeptidase                          | N-linked               | 2  |    | 2  | 3  | 1  | 2  |    | 2  |    | 1  | 2  | 4  | 2  | 3  | 7  | 1  |
| O14494 | PLPP1         | Phospholipid phosphatase 1                              | N-linked               |    | 2  | 2  | 3  | 2  | 2  |    |    |    | 1  | 2  | 2  | 2  | 4  | 6  | 3  |
| P00558 | PGK1          | Phosphoglycerate kinase 1                               |                        | 2  | 4  |    | 1  | 2  | 2  |    |    |    | 2  | 1  | 5  | 2  | 15 | 20 | 7  |
| P01009 | SERPINA1      | Alpha-1-antitrypsin                                     | N-linked               | 1  | 3  | 2  | 2  |    |    | 2  | 1  | 2  | 1  | 1  | 3  | 4  | 5  | 6  | 2  |
| P02042 | HBD           | Hemoglobin subunit delta                                |                        |    |    | 5  |    |    |    |    | 6  |    |    |    | 2  | 5  | 14 | 15 | 12 |
| P02750 | LRG1          | Leucine-rich alpha-2-glycoprotein                       | N-linked, O-linked     |    | 1  | 1  | 3  |    |    | 6  |    | 2  |    | 3  | 5  | 7  | 7  | 9  | 2  |
| P04083 | ANXA1         | Annexin A1                                              |                        |    |    | 3  |    | 1  |    |    | 7  |    |    |    |    |    | 5  | 8  | 8  |
| P04908 | HIST1H2A<br>B | Histone H2A type 1-B/E                                  |                        |    |    |    |    |    |    | 2  | 9  |    |    |    |    |    | 7  | 8  | 8  |
| P06703 | S100A6        | Protein S100-A6                                         |                        |    | 1  | 1  | 1  |    | 1  | 5  | 2  | 2  | 1  | 2  |    | 1  | 4  | 4  | 3  |

| ACCN   | Gene Name      | Protein Name                                                  | Annotated Glycosylated | N1 | N2 | N3 | N4 | N5 | N6 | N7 | N8 | C1 | C2 | C3 | C4 | C5 | C6 | C7 | C8 |
|--------|----------------|---------------------------------------------------------------|------------------------|----|----|----|----|----|----|----|----|----|----|----|----|----|----|----|----|
| P08253 | MMP2           | 72 kDa type IV collagenase                                    | N-linked               | 3  | 1  | 3  | 4  |    |    |    |    | 3  | 2  | 2  | 3  |    |    |    |    |
| P0C0S8 | HIST1H2A<br>G  | Histone H2A type 1                                            |                        |    |    |    |    |    |    | 2  | 9  |    |    |    |    |    | 7  | 8  | 8  |
| P12830 | CDH1           | Cadherin-1                                                    | N-linked               | 1  |    | 4  | 3  | 2  | 1  |    |    |    | 1  | 2  |    | 4  |    | 3  |    |
| P13987 | CD59           | CD59 glycoprotein                                             | N-linked, O-linked     | 1  | 1  | 1  | 2  | 1  | 1  | 2  | 2  | 1  | 1  | 1  | 1  | 1  | 2  | 2  | 2  |
| P20671 | HIST1H2A<br>D  | Histone H2A type 1-D                                          |                        |    |    |    |    |    |    | 2  | 9  |    |    |    |    |    | 7  | 8  | 8  |
| P23142 | FBLN1          | Fibulin-1                                                     | N-linked               | 2  | 2  | 2  | 3  |    |    | 2  |    | 1  | 2  | 2  | 1  |    | 3  | 3  |    |
| Q16777 | HIST2H2A<br>C  | Histone H2A type 2-C                                          |                        |    |    |    |    |    |    | 2  | 9  |    |    |    |    |    | 7  | 8  | 8  |
| Q53GD3 | SLC44A4        | Choline transporter-like protein 4                            | N-linked               | 1  | 2  | 1  | 2  | 1  | 2  | 2  |    | 2  | 2  | 2  | 2  | 1  | 3  | 7  | 2  |
| Q6FI13 | HIST2H2A<br>A3 | Histone H2A type 2-A                                          |                        |    |    |    |    |    |    | 2  | 9  |    |    |    |    |    | 7  | 8  | 8  |
| Q7L7L0 | HIST3H2A       | Histone H2A type 3                                            |                        |    |    |    |    |    |    | 2  | 9  |    |    |    |    |    | 7  | 8  | 8  |
| Q8NFD2 | ANKK1          | Ankyrin repeat and protein kinase domain-containing protein 1 |                        |    |    |    | 4  | 7  |    |    |    |    |    |    |    | 1  |    |    |    |
| Q93077 | HIST1H2A<br>C  | Histone H2A type 1-C                                          |                        |    |    |    |    |    |    | 2  | 9  |    |    |    |    |    | 7  | 8  | 8  |
| Q99878 | HIST1H2A<br>J  | Histone H2A type 1-J                                          |                        |    |    |    |    |    |    | 2  | 9  |    |    |    |    |    | 7  | 8  | 8  |
| Q9BTM1 | H2AFJ          | Histone H2A.J                                                 |                        |    |    |    |    |    |    | 2  | 9  |    |    |    |    |    | 7  | 8  | 8  |
| Q9Y6C2 | EMILIN1        | EMILIN-1                                                      | N-linked               |    |    | 5  | 3  | 2  | 1  |    |    |    |    |    |    | 3  |    |    |    |
| O00391 | QSOX1          | Sulfhydryl oxidase 1                                          | N-linked               | 3  | 1  | 1  | 2  | 2  |    | 1  |    |    | 1  | 3  |    |    |    | 2  |    |
| P00750 | PLAT           | Tissue-type plasminogen activator                             | N-linked, O-linked     | 1  | 2  |    | 1  | 1  | 1  | 4  |    | 1  |    |    | 1  |    |    |    |    |
| P05155 | SERPING1       | Plasma protease C1 inhibitor                                  | N-linked, O-linked     | 1  | 2  | 1  | 1  |    | 1  | 4  |    | 3  |    | 1  | 3  | 2  | 14 | 16 |    |
| P06576 | ATP5B          | ATP synthase subunit beta, mitochondrial                      | O-linked               |    | 1  | 2  | 2  | 1  | 2  |    | 2  |    |    | 1  | 6  | 1  | 12 | 20 | 14 |
| P07195 | LDHB           | L-lactate dehydrogenase B chain                               |                        | 1  |    | 2  | 1  | 2  | 2  |    | 2  |    | 1  |    | 1  |    | 2  | 5  | 4  |
| P0CG47 | UBB            | Polyubiquitin-B [Cleaved into: Ubiquitin]                     |                        |    |    |    |    |    |    | 4  | 6  |    |    |    |    |    | 5  | 6  | 5  |
| P16422 | EPCAM          | Epithelial cell adhesion molecule                             | N-linked               | 1  | 1  | 1  | 1  | 1  | 1  | 2  | 2  | 3  | 2  | 2  | 1  | 2  | 2  | 4  |    |
| P19105 | MYL12A         | Myosin regulatory light chain 12A                             |                        |    |    |    |    | 1  | 1  | 4  | 4  | 1  |    |    |    | 4  | 6  | 4  | 8  |
| P29401 | TKT            | Transketolase                                                 |                        | 1  | 1  | 2  |    | 5  | 1  |    |    |    |    |    | 1  | 1  |    | 7  | 7  |
| P35580 | MYH10          | Myosin-10                                                     |                        |    |    |    |    |    |    |    | 10 |    |    |    |    |    |    |    | 9  |
| P42892 | ECE1           | Endothelin-converting enzyme 1                                | N-linked               | 3  | 1  |    | 3  |    | 1  |    | 2  | 2  | 3  | 2  | 3  | 4  | 2  | 7  | 3  |
| P62979 | RPS27A         | Ubiquitin-40S ribosomal protein S27a                          |                        |    |    |    |    |    |    | 4  | 6  |    |    |    |    |    | 5  | 6  | 5  |

| ACCN   | Gene Name | Protein Name                           | Annotated Glycosylated | N1 | N2 | N3 | N4 | N5 | N6 | N7 | N8 | C1 | C2 | C3 | C4 | C5 | C6 | C7 | C8 |
|--------|-----------|----------------------------------------|------------------------|----|----|----|----|----|----|----|----|----|----|----|----|----|----|----|----|
| P62987 | UBA52     | Ubiquitin-60S ribosomal protein L40    |                        |    |    |    |    |    |    | 4  | 6  |    |    |    |    |    | 5  | 6  | 5  |
| P78310 | CXADR     | Coxsackievirus and adenovirus receptor | N-linked               | 2  | 1  | 1  | 2  |    | 1  | 3  |    | 2  | 2  | 3  | 1  | 4  | 2  | 2  |    |
| Q05682 | CALD1     | Caldesmon                              |                        | 2  | 3  | 2  | 1  | 1  |    | 1  |    | 4  | 6  | 10 | 4  | 2  |    |    | 6  |
| Q14315 | FLNC      | Filamin-C                              |                        | 2  |    |    |    | 4  |    |    | 4  |    |    |    |    |    |    |    | 3  |
| Q16563 | SYPL1     | Synaptophysin-like protein 1           | N-linked               | 1  | 1  | 1  | 1  | 1  | 1  | 2  | 2  | 1  | 1  | 2  | 1  | 1  | 2  | 2  | 2  |
| Q6UX06 | OLFM4     | Olfactomedin-4                         | N-linked               | 5  | 1  |    | 4  |    |    |    |    | 1  | 2  | 2  | 2  |    | 10 | 13 |    |
| Q71U36 | TUBA1A    | Tubulin alpha-1A chain                 |                        |    |    |    |    |    |    |    | 10 |    |    |    |    |    |    |    | 9  |
| Q7Z406 | MYH14     | Myosin-14                              |                        |    |    |    |    |    |    |    | 10 |    |    |    |    |    |    |    | 6  |
| Q9H5V8 | CDCP1     | CUB domain-containing protein 1        | N-linked               |    | 1  | 3  | 3  | 2  | 1  |    |    | 1  | 2  | 1  |    | 3  | 6  | 1  |    |
| O15118 | NPC1      | Niemann-Pick C1 protein                | N-linked               | 1  | 1  | 1  | 3  |    | 2  |    | 1  | 1  | 2  | 2  | 1  | 2  | 8  | 6  | 3  |
| P04075 | ALDOA     | Fructose-bisphosphate aldolase A       |                        | 1  | 2  | 3  |    | 2  | 1  |    |    |    | 1  |    | 2  | 2  | 7  | 8  | 7  |
| P07602 | PSAP      | Prosaposin                             | N-linked               | 2  |    | 1  | 2  |    |    | 4  |    | 2  | 1  | 2  |    | 3  |    |    |    |
| P07996 | THBS1     | Thrombospondin-1                       | N-linked, O-linked     | 2  | 3  | 1  | 3  |    |    |    |    | 1  | 2  | 4  | 2  | 1  | 2  | 2  |    |
| P27487 | DPP4      | Dipeptidyl peptidase 4                 | N-linked               |    | 1  | 2  | 2  | 1  | 1  | 2  |    | 3  |    |    | 2  | 6  | 8  | 8  | 9  |
| P39060 | COL18A1   | Collagen alpha-1                       | N-linked, O-linked     | 1  | 1  | 2  | 2  |    | 1  | 2  |    |    | 1  |    |    | 2  |    |    | 2  |
| P48668 | KRT6C     | Keratin, type II cytoskeletal 6C       |                        |    |    |    |    |    |    |    | 9  |    |    |    |    |    |    |    |    |
| Q04695 | KRT17     | Keratin, type I cytoskeletal 17        |                        |    |    | 5  |    |    |    |    | 4  | 5  |    |    |    |    |    |    | 6  |
| A5A3E0 | POTEF     | POTE ankyrin domain family member F    |                        |    |    |    |    |    |    |    | 8  |    |    |    |    |    |    |    | 12 |
| O14950 | MYL12B    | Myosin regulatory light chain 12B      |                        |    |    |    |    |    |    | 4  | 4  |    |    |    |    |    | 6  | 4  | 8  |
| O60487 | MPZL2     | Myelin protein zero-like protein 2     | N-linked               | 1  |    | 1  | 2  | 1  | 1  | 2  |    |    | 2  | 2  | 1  | 1  | 2  |    |    |
| O95858 | TSPAN15   | Tetraspanin-15                         | N-linked               |    | 1  | 1  | 2  |    | 1  | 3  |    | 2  |    |    | 1  | 1  | 3  | 2  |    |
| P01019 | AGT       | Angiotensinogen                        | N-linked               |    | 2  |    | 1  |    | 2  | 3  |    |    | 1  |    | 2  | 1  | 4  | 6  |    |
| P07737 | PFN1      | Profilin-1                             |                        | 1  | 1  | 2  | 1  |    | 1  |    | 2  |    | 1  | 2  | 3  | 1  | 2  | 6  | 3  |
| P10253 | GAA       | Lysosomal alpha-glucosidase            | N-linked               |    | 1  | 3  | 1  | 1  |    | 2  |    |    | 1  | 1  | 3  | 5  | 10 | 13 |    |
| P31949 | S100A11   | Protein S100-A11                       |                        | 1  |    | 2  | 1  |    | 2  |    | 2  | 1  | 2  | 2  |    |    | 4  | 4  | 4  |
| P34931 | HSPA1L    | Heat shock 70 kDa protein 1-like       |                        | 4  |    |    |    |    |    |    | 4  |    |    |    |    |    |    |    |    |
| P37802 | TAGLN2    | Transgelin-2                           |                        | 2  | 1  | 2  | 2  |    | 1  |    |    |    | 3  | 3  | 1  | 1  | 2  | 2  | 7  |

| ACCN   | Gene Name | Protein Name                                                         | Annotated Glycosylated | N1 | N2 | N3 | N4 | N5 | N6 | N7 | N8 | C1 | C2 | C3 | C4 | C5 | C6 | C7 | C8 |
|--------|-----------|----------------------------------------------------------------------|------------------------|----|----|----|----|----|----|----|----|----|----|----|----|----|----|----|----|
| P54652 | HSPA2     | Heat shock-related 70 kDa protein 2                                  |                        |    |    |    |    |    |    | 4  | 4  |    | 3  | 3  |    |    |    |    | 10 |
| P80188 | LCN2      | Neutrophil gelatinase-associated lipocalin                           | N-linked               |    | 1  | 1  | 2  | 1  | 2  |    | 1  | 1  |    |    | 2  | 1  | 5  | 6  |    |
| P98160 | HSPG2     | Basement membrane-specific heparan sulfate proteoglycan core protein | N-linked, O-linked     |    |    |    | 1  | 1  | 2  |    | 4  |    |    |    |    |    |    |    |    |
| Q15365 | PCBP1     | Poly                                                                 |                        | 1  | 1  | 1  | 1  |    | 1  | 2  | 1  | 1  | 2  | 1  | 1  |    | 2  | 2  | 2  |
| Q16787 | LAMA3     | Laminin subunit alpha-3                                              | N-linked               |    |    |    | 1  | 3  | 2  | 2  |    |    |    |    |    |    |    |    |    |
| Q5VTE0 | EEF1A1P5  | Putative elongation factor 1-alpha-like 3                            |                        |    |    |    |    |    |    | 3  | 5  |    |    |    |    |    | 12 | 17 | 8  |
| Q6S8J3 | POTEE     | POTE ankyrin domain family member E                                  |                        |    |    |    |    |    |    |    | 8  |    |    |    |    |    |    |    | 12 |
| Q7Z2Q7 | LRRC70    | Leucine-rich repeat-containing protein 70                            | N-linked               |    | 2  | 4  |    | 2  |    |    |    |    |    |    |    | 2  |    |    |    |
| Q8N271 | PROM2     | Prominin-2                                                           | N-linked               | 2  | 1  | 1  | 4  |    |    |    |    |    | 3  | 1  | 3  |    |    |    |    |
| Q8NBN3 | TMEM87A   | Transmembrane protein 87A                                            | N-linked               | 1  | 1  | 1  | 3  | 1  | 1  |    |    |    | 1  | 1  |    | 2  | 4  | 5  | 2  |
| Q8WUH2 | TGFBRAP1  | Transforming growth factor-beta receptor-associated protein 1        |                        |    |    |    | 4  | 4  |    |    |    |    |    |    |    |    |    |    |    |
| Q96KP4 | CNDP2     | Cytosolic non-specific dipeptidase                                   |                        |    |    | 3  | 1  | 1  | 1  | 2  |    |    |    |    | 3  | 3  | 9  | 12 | 9  |
| Q9BVK6 | TMED9     | Transmembrane emp24 domain-containing protein 9                      | N-linked               | 1  | 1  | 2  |    | 1  | 1  | 2  |    |    | 1  | 1  | 2  | 3  | 8  | 7  | 3  |
| O00461 | GOLIM4    | Golgi integral membrane protein 4                                    | N-linked               |    | 1  | 1  | 1  | 1  | 1  |    | 2  |    |    |    | 1  | 1  |    |    |    |
| O43653 | PSCA      | Prostate stem cell antigen                                           | N-linked               |    | 1  | 1  |    |    | 1  | 2  | 2  |    | 1  |    |    |    |    |    |    |
| O75369 | FLNB      | Filamin-B                                                            |                        |    |    |    |    | 4  |    |    | 3  |    |    |    |    |    |    | 4  | 3  |
| O94919 | ENDOD1    | Endonuclease domain-containing 1 protein                             |                        |    | 1  | 1  | 1  | 1  | 1  | 2  |    |    | 1  |    | 3  | 1  | 2  | 2  |    |
| P00533 | EGFR      | Epidermal growth factor receptor                                     | N-linked               |    | 2  |    | 1  |    | 1  | 2  | 1  |    |    | 1  | 1  |    | 2  | 2  |    |
| P01889 | HLA-B     | HLA class I histocompatibility antigen, B-7 alpha chain              | N-linked               | 3  |    |    |    |    |    | 4  |    |    | 3  |    |    |    | 6  |    |    |
| P05023 | ATP1A1    | Sodium/potassium-transporting ATPase subunit alpha-1                 |                        |    |    | 3  | 2  |    |    |    | 2  |    |    |    |    |    | 9  | 5  | 9  |
| P07288 | KLK3      | Prostate-specific antigen                                            | N-linked               |    | 1  |    | 1  | 1  | 1  | 2  | 1  | 1  |    | 1  | 2  | 2  | 7  | 9  | 5  |
| P07585 | DCN       | Decorin                                                              | N-linked, O-linked     | 1  |    | 3  |    |    |    |    | 3  |    | 1  | 1  |    | 2  |    | 1  | 5  |
| P15941 | MUC1      | Mucin-1                                                              | N-linked, O-linked     | 1  | 1  | 1  | 1  |    | 1  | 2  |    | 1  | 2  | 3  | 1  | 2  | 5  | 8  | 1  |
| P19256 | CD58      | Lymphocyte function-associated antigen 3                             | N-linked               | 1  |    | 1  | 1  |    | 1  | 2  | 1  | 1  |    | 1  | 1  | 1  | 2  | 2  |    |
| P25705 | ATP5A1    | ATP synthase subunit alpha, mitochondrial                            | O-linked               |    |    | 3  | 2  |    | 2  |    |    |    |    |    | 5  |    | 13 | 15 | 12 |
| P37837 | TALDO1    | Transaldolase                                                        |                        | 1  | 1  | 1  | 1  | 1  | 1  | 1  |    |    | 1  | 1  | 2  | 1  | 5  | 7  | 3  |
| P40926 | MDH2      | Malate dehydrogenase, mitochondrial                                  | O-linked               | 1  |    | 3  | 1  | 1  | 1  |    |    |    | 1  |    | 4  | 3  | 4  | 8  | 16 |





| ACCN   | Gene Name | Protein Name                                                                                                                                                          | Annotated Glycosylated | N1 | N2 | N3 | N4 | N5 | N6 | N7 | N8 | C1 | C2 | C3 | C4 | C5 | C6 | C7 | C8 |
|--------|-----------|-----------------------------------------------------------------------------------------------------------------------------------------------------------------------|------------------------|----|----|----|----|----|----|----|----|----|----|----|----|----|----|----|----|
| Q15149 | PLEC      | Plectin                                                                                                                                                               |                        |    |    |    | 3  | 1  | 2  |    |    |    |    |    | 2  |    |    |    |    |
| Q92764 | KRT35     | Keratin, type I cuticular Ha5                                                                                                                                         |                        |    |    | 4  |    |    |    |    | 2  |    |    |    |    |    |    |    | 2  |
| Q9BYX7 | POTEKP    | Putative beta-actin-like protein 3                                                                                                                                    |                        |    |    |    |    |    |    |    | 6  |    |    |    |    |    |    |    | 8  |
| Q9NY65 | TUBA8     | Tubulin alpha-8 chain                                                                                                                                                 |                        |    |    |    |    |    |    |    | 6  |    |    |    |    |    |    |    | 6  |
| A6NIZ1 |           | Ras-related protein Rap-1b-like protein<br>Agrin [Cleaved into: Agrin N-terminal 110 kDa subunit; Agrin C-terminal 110 kDa subunit; Agrin C-terminal 90 kDa fragment] |                        | 1  |    |    | 1  |    | 1  |    | 2  |    | 1  | 1  |    |    |    |    | 2  |
| O00468 | AGRN      |                                                                                                                                                                       | N-linked, O-linked     | 1  |    |    | 1  |    | 1  |    | 2  |    |    |    |    |    |    |    |    |
| O14493 | CLDN4     | Claudin-4                                                                                                                                                             |                        |    |    | 1  | 1  |    | 1  | 2  |    | 1  | 1  | 1  | 1  | 1  | 2  | 2  | 2  |
| O43707 | ACTN4     | Alpha-actinin-4                                                                                                                                                       |                        |    |    |    |    | 3  |    |    | 2  |    |    |    |    |    | 2  | 5  | 12 |
| O43852 | CALU      | Calumenin                                                                                                                                                             | N-linked               |    |    | 1  |    |    | 1  | 3  |    |    | 1  | 1  |    |    | 3  | 4  | 5  |
| O60664 | PLIN3     | Perilipin-3                                                                                                                                                           |                        |    | 3  | 2  |    |    |    |    |    |    |    | 1  | 4  | 3  |    |    |    |
| P00505 | GOT2      | Aspartate aminotransferase, mitochondrial                                                                                                                             |                        |    |    | 3  |    | 2  |    |    |    |    |    |    |    |    | 1  | 4  | 10 |
| P04040 | CAT       | Catalase                                                                                                                                                              |                        |    |    | 3  |    | 2  |    |    |    |    |    |    |    |    |    |    |    |
| P06899 | HIST1H2BJ | Histone H2B type 1-J                                                                                                                                                  | O-linked               |    |    |    |    |    |    | 1  | 4  |    |    |    |    |    |    | 3  | 3  |
| P10319 | HLA-B     | HLA class I histocompatibility antigen, B-58 alpha chain                                                                                                              | N-linked               |    | 1  |    | 2  |    | 2  |    |    |    |    |    |    | 2  |    |    | 4  |
| P10599 | TXN       | Thioredoxin                                                                                                                                                           |                        |    |    | 1  | 2  |    |    | 2  |    | 3  |    |    |    | 2  | 2  | 2  | 2  |
| P13646 | KRT13     | Keratin, type I cytoskeletal 13                                                                                                                                       |                        |    |    |    |    |    |    |    | 5  |    |    |    |    |    |    |    | 11 |
| P15151 | PVR       | Poliovirus receptor                                                                                                                                                   | N-linked               | 1  | 1  | 1  | 2  |    |    |    |    | 1  | 1  |    | 1  | 2  | 2  |    | 2  |
| P15259 | PGAM2     | Phosphoglycerate mutase 2                                                                                                                                             |                        |    |    |    | 1  |    | 1  | 2  | 1  |    | 1  |    |    |    | 2  | 2  | 2  |
| P16870 | CPE       | Carboxypeptidase E                                                                                                                                                    | N-linked               |    | 1  |    |    | 1  | 1  | 2  |    |    |    |    | 1  |    | 2  | 2  |    |
| P17813 | ENG       | Endoglin                                                                                                                                                              | N-linked               |    | 1  | 2  | 2  |    |    |    |    |    | 3  | 1  | 2  | 2  | 4  | 4  | 7  |
| P23284 | PPIB      | Peptidyl-prolyl cis-trans isomerase B                                                                                                                                 | N-linked               |    | 3  | 1  | 1  |    |    |    |    |    |    |    | 4  | 1  | 4  | 5  | 7  |
| P23527 | HIST1H2BO | Histone H2B type 1-O                                                                                                                                                  | O-linked               |    |    |    |    |    |    | 1  | 4  |    |    |    |    |    |    | 3  | 3  |
| P30041 | PRDX6     | Peroxiredoxin-6                                                                                                                                                       |                        | 1  | 2  |    |    |    |    |    | 2  | 1  | 1  | 2  | 1  |    | 3  | 6  | 5  |
| P31946 | YWHAB     | 14-3-3 protein beta/alpha                                                                                                                                             |                        | 4  |    |    |    |    |    |    | 1  |    | 3  | 4  |    |    |    |    | 3  |
| P33778 | HIST1H2BB | Histone H2B type 1-B                                                                                                                                                  | O-linked               |    |    |    |    |    |    | 1  | 4  |    |    |    |    |    |    | 3  | 3  |
| P36269 | GGT5      | Gamma-glutamyltransferase 5                                                                                                                                           | N-linked               |    | 1  | 1  | 1  |    |    |    | 2  |    | 1  | 1  | 2  | 1  | 2  | 2  | 4  |





| ACCN   | Gene Name  | Protein Name                                             | Annotated Glycosylated | N1 | N2 | N3 | N4 | N5 | N6 | N7 | N8 | C1 | C2 | C3 | C4 | C5 | C6 | C7 | C8 |
|--------|------------|----------------------------------------------------------|------------------------|----|----|----|----|----|----|----|----|----|----|----|----|----|----|----|----|
| P30480 | HLA-B      | HLA class I histocompatibility antigen, B-42 alpha chain | N-linked               |    |    |    |    |    |    |    | 4  |    |    |    |    |    | 6  |    |    |
| P35052 | GPC1       | Glypican-1                                               | N-linked, O-linked     |    |    | 2  | 1  |    | 1  |    |    |    |    |    |    |    |    |    |    |
| P35573 | AGL        | Glycogen debranching enzyme                              |                        |    | 1  | 1  | 1  |    | 1  |    |    | 1  |    |    |    | 1  | 1  |    | 1  |
| P51572 | BCAP31     | B-cell receptor-associated protein 31                    |                        |    |    | 1  | 2  |    |    | 1  |    |    |    |    | 1  | 1  | 2  | 2  | 2  |
| P55072 | VCP        | Transitional endoplasmic reticulum ATPase                |                        |    |    |    | 2  | 2  |    |    |    |    |    |    |    |    |    |    |    |
| P56199 | ITGA1      | Integrin alpha-1                                         | N-linked               |    |    | 1  | 1  |    |    |    | 2  | 1  | 1  | 4  |    | 3  |    |    | 8  |
| Q00796 | SORD       | Sorbitol dehydrogenase                                   |                        |    |    |    |    | 2  | 1  | 1  |    |    |    |    | 1  | 2  | 6  | 9  | 1  |
| Q01650 | SLC7A5     | Large neutral amino acids transporter small subunit 1    | N-linked               | 2  | 1  |    |    |    |    |    |    | 1  |    |    |    |    |    |    |    |
| Q04826 | HLA-B      | HLA class I histocompatibility antigen, B-40 alpha chain | N-linked               |    |    |    |    |    |    |    | 4  |    |    |    |    |    |    |    |    |
| Q13336 | SLC14A1    | Urea transporter 1                                       | N-linked               | 1  |    | 1  | 1  |    |    |    |    | 1  |    |    |    |    |    |    |    |
| Q13751 | LAMB3      | Laminin subunit beta-3                                   | N-linked               | 1  |    |    | 2  |    | 1  |    |    |    |    |    |    |    |    |    |    |
| Q2M2I5 | KRT24      | Keratin, type I cytoskeletal 24                          |                        |    |    |    |    |    |    |    |    | 4  |    |    |    |    |    |    | 4  |
| Q5XKE5 | KRT79      | Keratin, type II cytoskeletal 79                         |                        |    |    |    |    |    |    |    |    | 4  |    |    |    |    |    |    |    |
| Q71UI9 | H2AFV      | Histone H2A.V                                            |                        |    |    |    |    |    |    |    |    | 4  |    |    |    |    |    |    | 5  |
| Q92187 | ST8SIA4    | CMP-N-acetylneuraminase-poly-alpha-2,8-sialyltransferase | N-linked               |    | 1  | 1  | 1  | 1  |    |    |    | 1  |    | 1  |    | 1  |    |    |    |
| Q92485 | SMPDL3B    | Acid sphingomyelinase-like phosphodiesterase 3b          | N-linked               |    |    |    | 1  |    | 1  | 2  |    | 1  |    |    | 2  | 2  | 1  | 2  |    |
| Q969L2 | MAL2       | Protein MAL2                                             | N-linked               |    |    |    |    |    |    | 2  | 2  |    |    | 1  | 1  | 2  | 2  | 2  |    |
| Q96QV6 | HIST1H2A A | Histone H2A type 1-A                                     |                        |    |    |    |    |    |    |    |    | 4  |    |    |    |    |    |    | 4  |
| Q96S97 | MYADM      | Myeloid-associated differentiation marker                |                        |    |    | 1  |    |    | 1  |    | 2  |    |    |    | 1  | 1  |    |    |    |
| Q9BVC6 | TMEM109    | Transmembrane protein 109                                |                        |    | 1  | 1  | 1  |    |    |    |    | 1  |    | 1  | 1  | 1  | 2  | 1  | 2  |
| Q9NSB4 | KRT82      | Keratin, type II cuticular Hb2                           |                        |    |    | 4  |    |    |    |    |    |    |    |    |    |    |    |    |    |
| Q9Y5Y6 | ST14       | Suppressor of tumorigenicity 14 protein                  | N-linked               |    | 1  |    | 1  |    |    | 2  |    |    |    |    | 1  |    |    |    |    |
| A6NGU5 | GGT3P      | Putative gamma-glutamyltranspeptidase 3                  | N-linked               |    | 1  |    |    |    |    | 2  |    | 2  |    |    | 3  | 3  | 2  | 3  | 3  |
| A7E2Y1 | MYH7B      | Myosin-7B                                                |                        |    |    | 1  | 2  |    |    |    |    | 1  |    |    |    |    |    |    |    |
| O43240 | KLK10      | Kallikrein-10                                            | N-linked               |    |    | 1  | 1  | 1  |    |    |    |    |    |    |    |    |    |    |    |
| O95678 | KRT75      | Keratin, type II cytoskeletal 75                         |                        |    |    |    |    |    |    |    |    | 3  |    |    |    |    |    |    | 5  |
| P02763 | ORM1       | Alpha-1-acid glycoprotein 1                              | N-linked               |    |    |    |    |    |    |    | 3  | 4  |    |    |    | 2  | 2  | 7  |    |

| ACCN   | Gene Name | Protein Name                                             | Annotated Glycosylated | N1 | N2 | N3 | N4 | N5 | N6 | N7 | N8 | C1 | C2 | C3 | C4 | C5 | C6 | C7 | C8 |
|--------|-----------|----------------------------------------------------------|------------------------|----|----|----|----|----|----|----|----|----|----|----|----|----|----|----|----|
| P04233 | CD74      | HLA class II histocompatibility antigen gamma chain      | N-linked, O-linked     |    | 1  | 1  | 1  |    |    |    |    | 1  |    |    | 2  | 1  | 2  | 2  |    |
| P04350 | TUBB4A    | Tubulin beta-4A chain                                    |                        |    |    |    |    |    |    |    | 3  |    |    |    |    |    |    |    |    |
| P07492 | GRP       | Gastrin-releasing peptide                                |                        | 1  |    |    |    | 2  |    |    |    |    |    | 1  |    |    |    |    |    |
| P08123 | COL1A2    | Collagen alpha-2                                         | N-linked               | 1  |    |    |    |    |    |    | 2  |    |    |    |    | 1  |    |    |    |
| P09238 | MMP10     | Stromelysin-2                                            |                        | 1  |    |    | 1  |    | 1  |    |    |    |    |    | 2  |    | 2  | 2  |    |
| P09525 | ANXA4     | Annexin A4                                               |                        |    |    |    | 2  |    | 1  |    |    |    |    |    |    |    | 3  | 4  | 3  |
| P0C0L4 | C4A       | Complement C4-A                                          | N-linked, O-linked     |    |    |    |    |    | 1  | 2  |    | 1  |    |    | 5  | 7  |    | 63 | 1  |
| P12277 | CKB       | Creatine kinase B-type                                   |                        |    |    |    | 1  |    | 2  |    |    |    |    |    | 2  |    | 5  | 6  | 1  |
| P13726 | F3        | Tissue factor                                            | N-linked               |    |    |    |    |    | 1  | 2  |    | 1  |    |    |    |    |    |    | 1  |
| P14618 | PKM       | Pyruvate kinase PKM                                      |                        |    |    |    |    |    | 1  |    | 2  |    |    |    | 1  |    | 11 | 14 | 1  |
| P17693 | HLA-G     | HLA class I histocompatibility antigen, alpha chain G    | N-linked               |    |    |    |    |    |    | 3  |    |    |    |    |    |    |    |    | 2  |
| P18084 | ITGB5     | Integrin beta-5                                          | N-linked               |    |    |    | 1  |    | 2  |    |    | 1  |    |    |    |    |    |    |    |
| P18669 | PGAM1     | Phosphoglycerate mutase 1                                |                        |    |    |    |    |    |    | 2  | 1  |    |    |    |    |    | 2  | 2  | 2  |
| P19013 | KRT4      | Keratin, type II cytoskeletal 4                          |                        |    |    |    |    |    |    |    | 3  |    |    |    |    |    |    |    | 7  |
| P30456 | HLA-A     | HLA class I histocompatibility antigen, A-43 alpha chain | N-linked               | 3  |    |    |    |    |    |    |    |    |    |    |    |    |    |    | 4  |
| P30501 | HLA-C     | HLA class I histocompatibility antigen, Cw-2 alpha chain | N-linked               |    |    |    | 3  |    |    |    |    | 3  |    |    |    |    |    |    | 5  |
| P49221 | TGM4      | Protein-glutamine gamma-glutamyltransferase 4            |                        |    |    |    | 2  |    | 1  |    |    |    |    |    |    |    |    |    |    |
| P50336 | PPOX      | Protoporphyrinogen oxidase                               |                        |    |    |    |    |    |    | 1  | 2  |    |    |    |    |    | 2  | 2  | 2  |
| P55058 | PLTP      | Phospholipid transfer protein                            | N-linked               |    |    |    | 2  |    | 1  |    |    |    |    |    | 3  |    |    |    |    |
| P68371 | TUBB4B    | Tubulin beta-4B chain                                    |                        |    |    |    |    |    |    |    | 3  |    |    |    |    |    | 7  | 18 |    |
| P98172 | EFNB1     | Ephrin-B1                                                | N-linked               |    | 2  | 1  |    |    |    |    |    |    |    |    |    |    |    |    |    |
| Q01518 | CAP1      | Adenylyl cyclase-associated protein 1                    |                        |    |    |    | 1  | 1  | 1  |    |    |    |    |    |    | 1  | 2  | 2  | 3  |
| Q12767 | TMEM94    | Transmembrane protein 94                                 | N-linked               | 1  |    |    |    |    |    |    | 2  |    |    |    |    |    |    |    |    |
| Q13228 | SELENBP1  | Selenium-binding protein 1                               |                        |    |    |    | 2  |    | 1  |    |    |    |    |    | 1  |    |    |    |    |
| Q13813 | SPTAN1    | Spectrin alpha chain, non-erythrocytic 1                 |                        |    |    |    | 1  |    | 2  |    |    |    |    |    |    |    |    |    | 1  |
| Q14118 | DAG1      | Dystroglycan                                             | N-linked, O-linked     |    | 1  |    |    |    |    | 2  |    |    |    |    | 1  | 1  |    |    |    |
| Q14512 | FGFBP1    | Fibroblast growth factor-binding protein 1               | O-linked               | 1  | 1  |    | 1  |    |    |    |    |    |    | 1  | 1  |    |    |    |    |

| ACCN   | Gene Name | Protein Name                                                | Annotated Glycosylated | N1 | N2 | N3 | N4 | N5 | N6 | N7 | N8 | C1 | C2 | C3 | C4 | C5 | C6 | C7 | C8 |
|--------|-----------|-------------------------------------------------------------|------------------------|----|----|----|----|----|----|----|----|----|----|----|----|----|----|----|----|
| Q14956 | GPNUMB    | Transmembrane glycoprotein NMB                              | N-linked               |    | 1  | 1  | 1  |    |    |    |    |    |    |    | 1  | 2  | 1  |    |    |
| Q5T9S5 | CCDC18    | Coiled-coil domain-containing protein 18                    |                        |    |    |    | 1  |    | 1  |    | 1  |    |    |    | 1  |    |    |    |    |
| Q5VU43 | PDE4DIP   | Myomegalin                                                  |                        |    |    | 1  |    | 2  |    |    |    |    |    |    |    |    |    |    |    |
| Q687X5 | STEAP4    | Metalloreductase STEAP4                                     | N-linked               |    | 2  |    |    |    | 1  |    |    |    |    |    | 1  | 2  |    | 2  | 7  |
| Q6EMK4 | VASN      | Vasorin                                                     | N-linked               | 1  | 1  |    | 1  |    |    |    |    | 1  | 1  | 1  | 1  | 1  |    | 1  | 5  |
| Q7Z794 | KRT77     | Keratin, type II cytoskeletal 1b                            |                        |    |    |    |    |    |    |    | 3  |    |    |    |    |    |    |    | 3  |
| Q8IXW5 | RPAP2     | Putative RNA polymerase II subunit B1 CTD phosphatase RPAP2 |                        |    |    |    | 2  |    | 1  |    |    |    |    |    |    |    |    |    |    |
| Q8N0Y7 | PGAM4     | Probable phosphoglycerate mutase 4                          |                        |    |    |    |    |    |    | 2  | 1  |    |    |    |    |    | 2  | 2  | 2  |
| Q969P0 | IGSF8     | Immunoglobulin superfamily member 8                         | N-linked               | 1  |    |    | 1  |    | 1  |    |    |    | 2  | 2  | 1  |    |    |    |    |
| Q96DA0 | ZG16B     | Zymogen granule protein 16 homolog B                        | N-linked               |    | 1  |    | 2  |    |    |    |    | 3  |    |    |    |    | 3  | 4  |    |
| Q99456 | KRT12     | Keratin, type I cytoskeletal 12                             |                        |    |    |    |    |    |    | 1  | 2  |    |    |    |    |    |    |    | 2  |
| Q99988 | GDF15     | Growth/differentiation factor 15                            | N-linked               |    | 1  |    |    |    |    | 2  |    |    |    |    | 2  | 1  | 10 | 11 | 4  |
| Q9C0H2 | TTYH3     | Protein tweety homolog 3                                    | N-linked               | 1  | 1  |    | 1  |    |    |    |    |    | 1  | 3  | 1  | 2  |    |    |    |
| Q9H853 | TUBA4B    | Putative tubulin-like protein alpha-4B                      |                        |    |    |    |    |    |    |    | 3  |    |    |    |    |    |    |    | 2  |
| Q9HBA9 | FOLH1B    | Putative N-acetylated-alpha-linked acidic dipeptidase       | N-linked               |    |    |    | 1  |    |    | 2  |    |    |    |    |    |    |    |    | 1  |
| Q9NQC3 | RTN4      | Reticulon-4                                                 |                        |    |    | 1  | 2  |    |    |    |    |    |    |    |    | 2  | 1  | 2  | 1  |
| Q9UDY6 | TRIM10    | Tripartite motif-containing protein 10                      |                        | 3  |    |    |    |    |    |    |    |    | 5  | 5  |    |    |    |    |    |
| Q9Y3E0 | GOLT1B    | Vesicle transport protein GOT1B                             |                        | 1  |    | 1  | 1  |    |    |    |    | 1  | 1  | 1  |    | 1  | 1  | 2  |    |
| Q9Y653 | ADGRG1    | Adhesion G-protein coupled receptor G1                      | N-linked               | 1  |    |    | 1  |    |    |    | 1  |    |    |    |    |    |    |    |    |
| A6NNZ2 |           | Tubulin beta-8 chain-like protein LOC260334                 |                        |    |    |    |    |    |    |    | 2  |    |    |    |    |    |    |    |    |
| B3KS81 | SRRM5     | Serine/arginine repetitive matrix protein 5                 |                        |    |    |    |    | 2  |    |    |    |    |    |    |    |    |    |    |    |
| O00584 | RNASET2   | Ribonuclease T2                                             | N-linked               |    |    |    |    |    | 1  | 1  |    |    |    |    |    |    | 1  | 1  | 4  |
| O00746 | NME4      | Nucleoside diphosphate kinase, mitochondrial                |                        |    |    | 1  | 1  |    |    |    |    |    |    |    |    |    |    |    |    |
| O14880 | MGST3     | Microsomal glutathione S-transferase 3                      |                        |    |    |    | 1  |    |    |    | 1  |    |    |    |    |    |    | 1  |    |
| O15519 | CFLAR     | CASP8 and FADD-like apoptosis regulator                     |                        |    |    |    | 1  |    | 1  |    |    |    |    |    |    |    |    |    |    |
| O15551 | CLDN3     | Claudin-3                                                   |                        |    |    |    |    |    |    | 2  |    |    |    |    |    |    | 2  | 2  | 3  |
| O43493 | TGOLN2    | Trans-Golgi network integral membrane protein 2             | N-linked               |    |    | 1  | 1  |    |    |    |    | 2  | 1  | 2  | 1  | 1  |    | 1  |    |

| ACCN   | Gene Name | Protein Name                                            | Annotated Glycosylated | N1 | N2 | N3 | N4 | N5 | N6 | N7 | N8 | C1 | C2 | C3 | C4 | C5 | C6 | C7 | C8 |
|--------|-----------|---------------------------------------------------------|------------------------|----|----|----|----|----|----|----|----|----|----|----|----|----|----|----|----|
| O75106 | AOC2      | Retina-specific copper amine oxidase                    | N-linked               |    |    |    |    |    |    |    | 2  |    |    |    |    |    |    |    | 4  |
| O94886 | TMEM63A   | CSC1-like protein 1                                     |                        |    |    | 1  |    |    | 1  |    |    |    |    |    | 1  |    | 1  | 2  |    |
| O94985 | CLSTN1    | Calsyntenin-1                                           | N-linked               | 1  |    |    | 1  |    |    |    |    |    |    |    |    |    |    |    |    |
| O95197 | RTN3      | Reticulon-3                                             |                        |    |    |    |    |    |    |    | 2  |    |    |    |    |    | 2  | 2  | 2  |
| O95484 | CLDN9     | Claudin-9                                               |                        |    |    |    |    |    |    | 2  |    |    |    |    |    |    | 2  | 2  | 2  |
| O95786 | DDX58     | Probable ATP-dependent RNA helicase DDX58               |                        | 2  |    |    |    |    |    |    |    |    |    |    |    |    |    |    |    |
| P00403 | MT-CO2    | Cytochrome c oxidase subunit 2                          |                        |    |    |    | 1  |    |    |    | 1  |    |    |    | 1  |    | 2  | 2  | 2  |
| P01574 | IFNB1     | Interferon beta                                         | N-linked               |    |    |    |    |    |    |    | 2  |    |    |    |    |    |    |    |    |
| P01833 | PIGR      | Polymeric immunoglobulin receptor                       | N-linked               | 1  |    |    | 1  |    |    |    |    |    | 2  | 1  |    | 1  |    |    |    |
| P01903 | HLA-DRA   | HLA class II histocompatibility antigen, DR alpha chain | N-linked               |    | 1  | 1  |    |    |    |    |    |    | 2  | 2  | 2  | 2  | 2  | 2  | 4  |
| P02100 | HBE1      | Hemoglobin subunit epsilon                              |                        |    |    |    |    |    |    |    | 2  |    |    |    |    |    |    |    | 1  |
| P04921 | GYPC      | Glycophorin-C                                           | N-linked, O-linked     |    | 2  |    |    |    |    |    |    |    | 1  |    | 1  |    |    |    |    |
| P05783 | KRT18     | Keratin, type I cytoskeletal 18                         | O-linked               |    |    |    |    |    |    |    | 2  |    |    |    | 2  |    | 6  | 6  | 14 |
| P06396 | GSN       | Gelsolin                                                |                        |    |    | 1  |    | 1  |    |    |    |    |    |    |    |    | 1  | 2  | 2  |
| P06748 | NPM1      | Nucleophosmin                                           |                        | 1  |    | 1  |    |    |    |    |    |    | 1  | 2  | 1  | 2  |    | 4  |    |
| P07686 | HEXB      | Beta-hexosaminidase subunit beta                        | N-linked               |    |    |    | 1  | 1  |    |    |    |    |    |    |    |    | 2  | 3  |    |
| P08572 | COL4A2    | Collagen alpha-2                                        | N-linked               |    |    |    |    |    |    |    | 2  |    |    |    |    |    |    |    | 2  |
| P0C0L5 | C4B       | Complement C4-B                                         | N-linked               |    |    |    |    |    |    |    | 2  |    |    |    |    |    | 34 | 63 | 1  |
| P12035 | KRT3      | Keratin, type II cytoskeletal 3                         |                        |    |    |    |    |    |    |    | 2  |    |    |    |    |    |    |    | 5  |
| P12757 | SKIL      | Ski-like protein                                        |                        |    |    |    | 1  |    | 1  |    |    |    |    | 4  |    |    |    |    |    |
| P13639 | EEF2      | Elongation factor 2                                     |                        |    |    | 1  |    | 1  |    |    |    |    |    |    |    |    | 4  | 7  | 7  |
| P13747 | HLA-E     | HLA class I histocompatibility antigen, alpha chain E   | N-linked               |    |    |    | 2  |    |    |    |    |    |    |    |    | 2  |    |    | 2  |
| P14136 | GFAP      | Glial fibrillary acidic protein                         |                        |    |    |    |    |    |    |    | 2  |    |    |    |    |    |    |    | 3  |
| P14649 | MYL6B     | Myosin light chain 6B                                   |                        |    |    |    |    |    |    |    | 2  |    |    |    |    |    |    |    | 2  |
| P17066 | HSPA6     | Heat shock 70 kDa protein 6                             |                        |    |    |    |    |    |    |    | 2  |    |    |    |    |    |    |    |    |
| P18564 | ITGB6     | Integrin beta-6                                         | N-linked               |    | 1  |    | 1  |    |    |    |    |    |    |    | 1  |    |    | 2  |    |
| P19440 | GGT1      | Gamma-glutamyltranspeptidase 1                          | N-linked               |    |    |    |    |    |    |    | 2  |    |    |    |    |    | 2  | 3  | 3  |









| ACCN   | Gene Name | Protein Name                                                   | Annotated Glycosylated | N1 | N2 | N3 | N4 | N5 | N6 | N7 | N8 | C1 | C2 | C3 | C4 | C5 | C6 | C7 | C8 |
|--------|-----------|----------------------------------------------------------------|------------------------|----|----|----|----|----|----|----|----|----|----|----|----|----|----|----|----|
| B1APH4 | ZNF487    | Putative zinc finger protein 487                               |                        | 1  |    |    |    |    |    |    |    |    |    | 1  |    |    |    |    |    |
| C9JVW0 | INAFM1    | Putative transmembrane protein INAFM1                          |                        |    |    |    |    |    | 1  |    |    |    |    |    |    |    |    |    |    |
| O14495 | PLPP3     | Phospholipid phosphatase 3                                     | N-linked               |    |    | 1  |    |    |    |    |    |    |    |    |    |    |    |    |    |
| O14558 | HSPB6     | Heat shock protein beta-6                                      |                        |    |    |    |    | 1  |    |    |    | 1  |    |    |    |    |    |    |    |
| O14672 | ADAM10    | Disintegrin and metalloproteinase domain-containing protein 10 | N-linked               |    | 1  |    |    |    |    |    |    |    |    |    | 1  | 1  |    |    |    |
| O14773 | TPP1      | Tripeptidyl-peptidase 1                                        | N-linked               |    |    |    |    | 1  |    |    |    |    |    |    |    |    | 2  | 3  |    |
| O43570 | CA12      | Carbonic anhydrase 12                                          | N-linked               |    |    |    | 1  |    |    |    |    |    |    |    |    |    |    |    |    |
| O43657 | TSPAN6    | Tetraspanin-6                                                  | N-linked               | 1  |    |    |    |    |    |    |    | 1  | 1  | 1  |    | 1  |    |    |    |
| O60347 | TBC1D12   | TBC1 domain family member 12                                   |                        |    |    |    |    | 1  |    |    |    |    |    |    |    |    |    |    |    |
| O95425 | SVIL      | Supervillin                                                    |                        |    |    |    |    |    | 1  |    |    |    |    |    |    | 1  |    |    |    |
| P00441 | SOD1      | Superoxide dismutase [Cu-Zn]                                   |                        |    |    |    | 1  |    |    |    |    |    |    |    |    | 1  |    | 2  |    |
| P00915 | CA1       | Carbonic anhydrase 1                                           |                        |    |    | 1  |    |    |    |    |    |    |    |    |    |    | 2  | 3  |    |
| P01834 | IGKC      | Immunoglobulin kappa constant                                  |                        | 1  |    |    |    |    |    |    |    |    |    |    |    |    |    |    |    |
| P01857 | IGHG1     | Immunoglobulin heavy constant gamma 1                          | N-linked               |    |    | 1  |    |    |    |    |    |    |    |    |    |    |    |    |    |
| P02649 | APOE      | Apolipoprotein E                                               | N-linked, O-linked     | 1  |    |    |    |    |    |    |    |    | 5  | 5  |    | 1  |    |    |    |
| P02743 | APCS      | Serum amyloid P-component                                      | N-linked               |    |    |    |    |    |    |    |    |    |    |    |    |    |    |    | 1  |
| P02787 | TF        | Serotransferrin                                                | N-linked, O-linked     |    |    |    |    |    | 1  |    |    |    |    |    |    | 1  |    |    |    |
| P04004 | VTN       | Vitronectin                                                    | N-linked               |    |    |    |    |    |    |    |    |    |    |    | 1  |    |    |    |    |
| P04062 | GBA       | Glucosylceramidase                                             | N-linked               |    |    |    |    |    | 1  |    |    |    |    |    | 2  |    | 2  | 2  |    |
| P05141 | SLC25A5   | ADP/ATP translocase 2                                          |                        |    |    |    |    |    |    |    |    |    |    |    |    |    | 2  | 4  | 4  |
| P05937 | CALB1     | Calbindin                                                      |                        |    |    |    |    |    |    |    |    |    |    |    |    |    |    |    |    |
| P07196 | NEFL      | Neurofilament light polypeptide                                | O-linked               |    |    |    |    |    |    |    |    |    |    |    |    |    |    |    | 1  |
| P07197 | NEFM      | Neurofilament medium polypeptide                               | O-linked               |    |    |    |    |    |    |    |    |    |    |    |    |    |    |    | 1  |
| P07858 | CTSB      | Cathepsin B                                                    | N-linked               |    |    |    | 1  |    |    |    |    | 1  | 1  |    |    |    | 1  | 3  |    |
| P07942 | LAMB1     | Laminin subunit beta-1                                         | N-linked               | 1  |    |    |    |    |    |    |    |    | 1  | 1  |    |    |    |    |    |
| P08294 | SOD3      | Extracellular superoxide dismutase [Cu-Zn]                     | N-linked               |    |    |    |    |    |    | 1  |    |    |    |    | 1  |    | 2  | 2  |    |
| P09211 | GSTP1     | Glutathione S-transferase P                                    |                        |    | 1  |    |    |    |    |    |    |    |    |    |    |    | 1  | 5  |    |





| ACCN   | Gene Name | Protein Name                                       | Annotated Glycosylated | N1 | N2 | N3 | N4 | N5 | N6 | N7 | N8 | C1 | C2 | C3 | C4 | C5 | C6 | C7 | C8 |
|--------|-----------|----------------------------------------------------|------------------------|----|----|----|----|----|----|----|----|----|----|----|----|----|----|----|----|
| Q13126 | MTAP      | S-methyl-5'-thioadenosine phosphorylase            |                        |    |    |    | 1  |    |    |    |    |    |    |    |    |    |    |    |    |
| Q13136 | PPFIA1    | Liprin-alpha-1                                     |                        |    |    |    |    |    |    |    |    | 1  |    |    |    |    |    |    |    |
| Q13315 | ATM       | Serine-protein kinase ATM                          |                        |    |    |    |    | 1  |    |    |    |    |    |    |    |    |    |    |    |
| Q13642 | FHL1      | Four and a half LIM domains protein 1              |                        | 1  |    |    |    |    |    |    |    |    |    |    |    |    |    |    | 2  |
| Q14112 | NID2      | Nidogen-2                                          | N-linked               |    |    |    |    |    |    |    |    | 1  |    |    |    |    |    |    |    |
| Q14116 | IL18      | Interleukin-18                                     |                        |    |    |    |    | 1  |    |    |    |    |    |    |    |    |    |    |    |
| Q14204 | DYNC1H1   | Cytoplasmic dynein 1 heavy chain 1                 |                        |    |    |    |    | 1  |    |    |    |    |    |    |    |    |    |    |    |
| Q14232 | EIF2B1    | Translation initiation factor eIF-2B subunit alpha |                        | 1  |    |    |    |    |    |    |    |    |    |    |    | 1  |    |    |    |
| Q14974 | KPNB1     | Importin subunit beta-1                            |                        |    |    |    | 1  |    |    |    |    |    | 1  |    |    |    |    |    |    |
| Q14980 | NUMA1     | Nuclear mitotic apparatus protein 1                | O-linked               |    | 1  |    |    |    |    |    |    |    |    |    | 1  |    |    |    |    |
| Q15084 | PDIA6     | Protein disulfide-isomerase A6                     |                        |    |    |    |    | 1  |    |    |    |    |    |    | 1  |    | 8  | 7  | 6  |
| Q15262 | PTPRK     | Receptor-type tyrosine-protein phosphatase kappa   | N-linked               |    |    |    | 1  |    |    |    |    |    |    |    | 1  | 3  | 2  | 4  |    |
| Q15366 | PCBP2     | Poly                                               |                        |    | 1  |    |    |    |    |    |    |    |    |    |    |    |    |    |    |
| Q15836 | VAMP3     | Vesicle-associated membrane protein 3              |                        |    |    |    | 1  |    |    |    |    |    |    |    |    |    |    |    |    |
| Q16352 | INA       | Alpha-internexin                                   |                        |    |    |    |    |    |    |    |    | 1  |    |    |    |    |    |    | 1  |
| Q3MIR4 | TMEM30B   | Cell cycle control protein 50B                     | N-linked               |    | 1  |    |    |    |    |    |    |    |    |    | 1  |    | 1  |    |    |
| Q4KMZ1 | IQCC      | IQ domain-containing protein C                     |                        |    |    |    |    |    | 1  |    |    |    |    |    |    |    |    |    |    |
| Q53HC0 | CCDC92    | Coiled-coil domain-containing protein 92           |                        |    | 1  |    |    |    |    |    |    |    |    |    | 1  |    |    |    |    |
| Q5SYB0 | FRMPD1    | FERM and PDZ domain-containing protein 1           |                        |    | 1  |    |    |    |    |    |    |    |    |    |    |    |    |    |    |
| Q5VWN6 | FAM208B   | Protein FAM208B                                    |                        |    |    |    | 1  |    |    |    |    |    |    |    |    |    |    |    |    |
| Q68DK2 | ZFYVE26   | Zinc finger FYVE domain-containing protein 26      |                        |    |    |    |    |    |    |    | 1  |    |    |    |    |    |    |    |    |
| Q6NZI2 | PTRF      | Polymerase I and transcript release factor         |                        |    |    |    | 1  |    |    |    |    |    |    |    |    |    |    |    |    |
| Q6P1J6 | PLB1      | Phospholipase B1, membrane-associated              | N-linked               |    |    |    |    | 1  |    |    |    |    |    |    |    | 1  |    |    |    |
| Q6PI98 | INO80C    | INO80 complex subunit C                            |                        |    |    |    | 1  |    |    |    |    |    |    |    |    |    |    |    |    |
| Q6UWU2 | GLB1L     | Beta-galactosidase-1-like protein                  | N-linked               |    |    |    |    | 1  |    |    |    |    |    |    |    |    |    |    |    |
| Q6UXG2 | KIAA1324  | UPF0577 protein KIAA1324                           | N-linked               |    | 1  |    |    |    |    |    |    | 2  | 1  | 1  | 1  |    | 6  | 6  | 2  |
| Q6ZRP7 | QSOX2     | Sulfhydryl oxidase 2                               | N-linked               | 1  |    |    |    |    |    |    |    |    | 1  |    |    |    |    |    |    |



| ACCN   | Gene Name | Protein Name                                         | Annotated Glycosylated | N1 | N2 | N3 | N4 | N5 | N6 | N7 | N8 | C1 | C2 | C3 | C4 | C5 | C6 | C7 | C8 |
|--------|-----------|------------------------------------------------------|------------------------|----|----|----|----|----|----|----|----|----|----|----|----|----|----|----|----|
| Q9BYB0 | SHANK3    | SH3 and multiple ankyrin repeat domains protein 3    |                        |    |    |    | 1  |    |    |    |    |    |    |    |    |    |    |    |    |
| Q9BYG4 | PARD6G    | Partitioning defective 6 homolog gamma               |                        |    |    |    | 1  |    |    |    |    |    |    |    |    |    |    |    |    |
| Q9GZN1 | ACTR6     | Actin-related protein 6                              |                        |    |    |    |    |    |    | 1  |    |    |    |    |    |    |    |    |    |
| Q9GZZ9 | UBA5      | Ubiquitin-like modifier-activating enzyme 5          |                        |    |    |    |    | 1  |    |    |    |    |    |    |    |    |    |    |    |
| Q9H0C2 | SLC25A31  | ADP/ATP translocase 4                                |                        |    |    |    |    |    |    |    | 1  |    |    |    |    |    | 2  |    | 4  |
| Q9NQ84 | GPRC5C    | G-protein coupled receptor family C group 5 member C | N-linked               |    | 1  |    |    |    |    |    |    |    |    |    | 1  |    |    |    |    |
| Q9NQX4 | MYO5C     | Unconventional myosin-Vc                             |                        |    |    |    |    |    | 1  |    |    |    |    |    |    |    |    |    |    |
| Q9NR09 | BIRC6     | Baculoviral IAP repeat-containing protein 6          |                        |    |    |    |    |    | 1  |    |    |    |    |    |    |    |    |    |    |
| Q9NVN3 | RIC8B     | Synembryn-B                                          |                        |    |    |    |    |    |    |    | 1  |    |    |    |    |    |    |    |    |
| Q9NX62 | IMPAD1    | Inositol monophosphatase 3                           | N-linked               |    |    |    |    |    | 1  |    |    |    |    |    |    |    |    |    |    |
| Q9NY35 | CLDND1    | Claudin domain-containing protein 1                  | N-linked               | 1  |    |    |    |    |    |    |    |    |    |    |    |    |    |    |    |
| Q9NYZ2 | SLC25A37  | Mitoferrin-1                                         |                        | 1  |    |    |    |    |    |    |    |    |    | 1  |    |    |    |    |    |
| Q9NZK5 | CECR1     | Adenosine deaminase CECR1                            | N-linked               |    |    |    |    |    |    | 1  |    |    |    |    |    |    |    |    |    |
| Q9P2E9 | RRBP1     | Ribosome-binding protein 1                           |                        |    |    |    | 1  |    |    |    |    | 5  | 1  |    | 3  | 6  |    |    |    |
| Q9UBY0 | SLC9A2    | Sodium/hydrogen exchanger 2                          | N-linked               |    |    |    | 1  |    |    |    |    | 1  |    |    |    |    |    |    |    |
| Q9UBZ9 | REV1      | DNA repair protein REV1                              |                        |    |    |    | 1  |    |    |    |    |    |    |    |    |    |    |    |    |
| Q9UGC7 | MTRF1L    | Peptide chain release factor 1-like, mitochondrial   |                        | 1  |    |    |    |    |    |    |    |    |    |    |    |    |    |    |    |
| Q9UGM3 | DMBT1     | Deleted in malignant brain tumors 1 protein          | N-linked               | 1  |    |    |    |    |    |    |    |    |    |    |    |    |    |    |    |
| Q9UHL4 | DPP7      | Dipeptidyl peptidase 2                               | N-linked               |    |    |    | 1  |    |    |    |    |    |    |    |    | 7  | 6  | 10 | 1  |
| Q9UKX3 | MYH13     | Myosin-13                                            |                        |    | 1  |    |    |    |    |    |    |    |    |    |    |    |    |    |    |
| Q9ULX5 | RNF112    | RING finger protein 112                              |                        |    | 1  |    |    |    |    |    |    |    |    |    |    |    |    |    |    |
| Q9UMS6 | SYNPO2    | Synaptopodin-2                                       |                        | 1  |    |    |    |    |    |    |    | 1  | 2  | 3  |    |    |    |    |    |
| Q9UNN8 | PROCR     | Endothelial protein C receptor                       | N-linked               |    |    |    |    |    |    | 1  |    |    |    |    |    |    |    |    | 2  |
| Q9Y6M5 | SLC30A1   | Zinc transporter 1                                   | N-linked               |    |    |    | 1  |    |    |    |    |    |    |    |    |    |    |    |    |
| Q9Y6R7 | FCGBP     | IgGFc-binding protein                                | N-linked               |    |    |    | 1  |    |    |    |    |    |    |    |    |    |    |    |    |
| A1L1A6 | IGSF23    | Immunoglobulin superfamily member 23                 | N-linked               |    |    |    |    |    |    |    |    |    | 1  |    |    |    |    |    |    |
| A6NMS3 | OR5K4     | Olfactory receptor 5K4                               | N-linked               |    |    |    |    |    |    |    |    | 1  |    |    |    |    |    |    |    |



| ACCN   | Gene Name | Protein Name                                                                                  | Annotated Glycosylated | N1 | N2 | N3 | N4 | N5 | N6 | N7 | N8 | C1 | C2 | C3 | C4 | C5 | C6 | C7 | C8 |
|--------|-----------|-----------------------------------------------------------------------------------------------|------------------------|----|----|----|----|----|----|----|----|----|----|----|----|----|----|----|----|
| A8MQT2 | GOLGA8B   | Golgin subfamily A member 8B                                                                  |                        |    |    |    |    |    |    |    |    |    |    |    |    | 1  |    |    |    |
| A8MTJ3 | GNAT3     | Guanine nucleotide-binding protein G                                                          |                        |    |    |    |    |    |    |    |    |    |    |    |    |    | 2  | 2  |    |
| B2RTY4 | MYO9A     | Unconventional myosin-IXa                                                                     |                        |    |    |    |    |    |    |    |    |    |    |    |    | 1  |    |    |    |
| O00161 | SNAP23    | Synaptosomal-associated protein 23                                                            |                        |    |    |    |    |    |    |    |    | 1  |    |    |    | 1  |    |    |    |
| O00459 | PIK3R2    | Phosphatidylinositol 3-kinase regulatory subunit beta                                         |                        |    |    |    |    |    |    |    |    |    |    |    |    | 1  |    |    |    |
| O00533 | CHL1      | Neural cell adhesion molecule L1-like protein                                                 | N-linked               |    |    |    |    |    |    |    |    |    |    |    | 4  |    |    |    |    |
| O00592 | PODXL     | Podocalyxin                                                                                   | N-linked               |    |    |    |    |    |    |    |    |    |    |    |    |    | 1  | 1  | 2  |
| O14497 | ARID1A    | AT-rich interactive domain-containing protein 1A                                              |                        |    |    |    |    |    |    |    |    |    | 1  |    |    |    |    |    |    |
| O14556 | GAPDHS    | Glyceraldehyde-3-phosphate dehydrogenase, testis-specific                                     |                        |    |    |    |    |    |    |    |    |    |    |    |    |    |    |    | 2  |
| O14617 | AP3D1     | AP-3 complex subunit delta-1                                                                  |                        |    |    |    |    |    |    |    |    |    |    |    |    | 2  |    |    |    |
| O15031 | PLXNB2    | Plexin-B2                                                                                     | N-linked               |    |    |    |    |    |    |    |    |    | 1  |    |    |    | 1  | 2  |    |
| O43278 | SPINT1    | Kunitz-type protease inhibitor 1                                                              | N-linked               |    |    |    |    |    |    |    |    |    |    |    | 1  |    |    |    |    |
| O43286 | B4GALT5   | Beta-1,4-galactosyltransferase 5                                                              | N-linked               |    |    |    |    |    |    |    |    |    |    |    |    |    | 2  | 2  | 2  |
| O43505 | B4GAT1    | Beta-1,4-glucuronyltransferase 1                                                              | N-linked               |    |    |    |    |    |    |    |    |    |    |    | 1  |    |    |    |    |
| O43567 | RNF13     | E3 ubiquitin-protein ligase RNF13                                                             | N-linked               |    |    |    |    |    |    |    |    |    |    | 1  |    |    |    | 2  |    |
| O43760 | SYNGR2    | Synaptogyrin-2                                                                                |                        |    |    |    |    |    |    |    |    | 2  |    |    | 2  | 2  | 1  | 1  | 6  |
| O43829 | ZBTB14    | Zinc finger and BTB domain-containing protein 14                                              |                        |    |    |    |    |    |    |    |    |    |    |    |    |    |    |    | 1  |
| O60264 | SMARCA5   | SWI/SNF-related matrix-associated actin-dependent regulator of chromatin subfamily A member 5 |                        |    |    |    |    |    |    |    |    |    |    |    |    |    | 1  |    |    |
| O60293 | ZFC3H1    | Zinc finger C3H1 domain-containing protein                                                    |                        |    |    |    |    |    |    |    |    |    |    |    |    | 3  |    |    |    |
| O60361 | NME2P1    | Putative nucleoside diphosphate kinase                                                        |                        |    |    |    |    |    |    |    |    |    |    |    |    |    |    |    | 2  |
| O60888 | CUTA      | Protein CutA                                                                                  |                        |    |    |    |    |    |    |    |    |    |    |    | 1  |    |    |    |    |
| O75071 | EFCAB14   | EF-hand calcium-binding domain-containing protein 14                                          |                        |    |    |    |    |    |    |    |    |    |    |    |    | 1  |    |    |    |
| O75144 | ICOSLG    | ICOS ligand                                                                                   | N-linked               |    |    |    |    |    |    |    |    | 1  |    |    |    | 1  | 1  |    |    |
| O75185 | ATP2C2    | Calcium-transporting ATPase type 2C member 2                                                  |                        |    |    |    |    |    |    |    |    |    | 1  |    |    |    |    |    |    |
| O75223 | GGCT      | Gamma-glutamylcyclotransferase                                                                |                        |    |    |    |    |    |    |    |    |    |    |    | 1  |    |    |    |    |
| O75390 | CS        | Citrate synthase, mitochondrial                                                               |                        |    |    |    |    |    |    |    |    |    |    |    |    |    |    |    | 1  |
| O75874 | IDH1      | Isocitrate dehydrogenase [NADP] cytoplasmic                                                   |                        |    |    |    |    |    |    |    |    |    |    |    |    |    | 6  | 10 | 4  |









| ACCN   | Gene Name | Protein Name                                                                  | Annotated Glycosylated | N1 | N2 | N3 | N4 | N5 | N6 | N7 | N8 | C1 | C2 | C3 | C4 | C5 | C6 | C7 | C8 |
|--------|-----------|-------------------------------------------------------------------------------|------------------------|----|----|----|----|----|----|----|----|----|----|----|----|----|----|----|----|
| P30505 | HLA-C     | HLA class I histocompatibility antigen, Cw-8 alpha chain                      | N-linked               |    |    |    |    |    |    |    |    |    |    |    |    |    |    |    | 5  |
| P30508 | HLA-C     | HLA class I histocompatibility antigen, Cw-12 alpha chain                     | N-linked               |    |    |    |    |    |    |    |    |    |    |    |    |    |    |    | 7  |
| P30510 | HLA-C     | HLA class I histocompatibility antigen, Cw-14 alpha chain                     | N-linked               |    |    |    |    |    |    |    |    |    |    |    |    |    |    |    | 5  |
| P30512 | HLA-A     | HLA class I histocompatibility antigen, A-29 alpha chain                      | N-linked               |    |    |    |    |    |    |    |    |    |    |    |    |    |    |    | 4  |
| P35232 | PHB       | Prohibitin                                                                    |                        |    |    |    |    |    |    |    |    |    |    |    |    |    | 6  | 10 | 9  |
| P35237 | SERPINB6  | Serpin B6                                                                     |                        |    |    |    |    |    |    |    |    |    |    |    | 1  | 1  |    |    |    |
| P35241 | RDX       | Radixin                                                                       |                        |    |    |    |    |    |    |    |    |    |    |    |    |    |    |    | 4  |
| P35442 | THBS2     | Thrombospondin-2                                                              | N-linked               |    |    |    |    |    |    |    |    |    |    |    | 1  | 1  |    |    |    |
| P35609 | ACTN2     | Alpha-actinin-2                                                               |                        |    |    |    |    |    |    |    |    |    |    |    |    |    |    |    | 3  |
| P37198 | NUP62     | Nuclear pore glycoprotein p62                                                 | O-linked               |    |    |    |    |    |    |    |    |    |    |    |    | 1  |    |    |    |
| P38405 | GNAL      | Guanine nucleotide-binding protein G                                          |                        |    |    |    |    |    |    |    |    |    |    |    |    |    | 2  | 2  |    |
| P39656 | DDOST     | Dolichyl-diphosphooligosaccharide--protein glycosyltransferase 48 kDa subunit |                        |    |    |    |    |    |    |    |    |    |    |    |    |    | 4  | 4  |    |
| P40189 | IL6ST     | Interleukin-6 receptor subunit beta                                           | N-linked               |    |    |    |    |    |    |    |    |    |    |    |    | 1  |    |    |    |
| P40925 | MDH1      | Malate dehydrogenase, cytoplasmic                                             |                        |    |    |    |    |    |    |    |    |    |    |    |    |    | 2  | 2  | 2  |
| P41219 | PRPH      | Peripherin                                                                    |                        |    |    |    |    |    |    |    |    |    |    |    |    |    |    |    | 2  |
| P41222 | PTGDS     | Prostaglandin-H2 D-isomerase                                                  | N-linked, O-linked     |    |    |    |    |    |    |    |    |    |    |    | 1  |    |    |    |    |
| P41250 | GARS      | Glycine--tRNA ligase                                                          |                        |    |    |    |    |    |    |    |    |    |    |    |    |    |    | 1  | 1  |
| P42126 | ECI1      | Enoyl-CoA delta isomerase 1, mitochondrial                                    |                        |    |    |    |    |    |    |    |    |    |    |    | 1  |    |    |    | 4  |
| P43251 | BTD       | Biotinidase                                                                   | N-linked               |    |    |    |    |    |    |    |    |    |    |    | 1  | 1  |    |    |    |
| P43490 | NAMPT     | Nicotinamide phosphoribosyltransferase                                        |                        |    |    |    |    |    |    |    |    |    |    |    |    |    |    | 12 |    |
| P47755 | CAPZA2    | F-actin-capping protein subunit alpha-2                                       |                        |    |    |    |    |    |    |    |    |    |    |    |    |    | 2  |    |    |
| P47756 | CAPZB     | F-actin-capping protein subunit beta                                          |                        |    |    |    |    |    |    |    |    |    |    |    |    |    |    | 1  | 2  |
| P47895 | ALDH1A3   | Aldehyde dehydrogenase family 1 member A3                                     |                        |    |    |    |    |    |    |    |    |    |    |    |    |    | 2  | 4  |    |
| P49447 | CYB561    | Cytochrome b561                                                               |                        |    |    |    |    |    |    |    |    | 1  |    |    |    | 1  |    | 2  | 1  |
| P49448 | GLUD2     | Glutamate dehydrogenase 2, mitochondrial                                      |                        |    |    |    |    |    |    |    |    |    |    |    |    |    | 2  | 7  | 15 |
| P49721 | PSMB2     | Proteasome subunit beta type-2                                                |                        |    |    |    |    |    |    |    |    |    |    |    |    |    |    | 1  | 1  |
| P49755 | TMED10    | Transmembrane emp24 domain-containing protein 10                              | N-linked               |    |    |    |    |    |    |    |    |    |    |    |    |    | 1  | 1  | 2  |



| ACCN   | Gene Name | Protein Name                                              | Annotated Glycosylated | N1 | N2 | N3 | N4 | N5 | N6 | N7 | N8 | C1 | C2 | C3 | C4 | C5 | C6 | C7 | C8 |
|--------|-----------|-----------------------------------------------------------|------------------------|----|----|----|----|----|----|----|----|----|----|----|----|----|----|----|----|
| P63092 | GNAS      | Guanine nucleotide-binding protein G                      |                        |    |    |    |    |    |    |    |    |    |    |    |    |    | 2  | 2  |    |
| P63096 | GNAI1     | Guanine nucleotide-binding protein G                      |                        |    |    |    |    |    |    |    |    |    |    |    |    |    | 2  | 2  |    |
| P68036 | UBE2L3    | Ubiquitin-conjugating enzyme E2 L3                        |                        |    |    |    |    |    |    |    |    | 1  |    |    |    |    |    |    |    |
| P78504 | JAG1      | Protein jagged-1                                          | N-linked               |    |    |    |    |    |    |    |    |    | 1  |    |    |    |    |    |    |
| P81605 | DCD       | Dermcidin                                                 |                        |    |    |    |    |    |    |    |    | 2  |    |    |    |    |    |    |    |
| P84077 | ARF1      | ADP-ribosylation factor 1                                 |                        |    |    |    |    |    |    |    |    |    |    |    |    |    | 2  | 4  |    |
| P84085 | ARF5      | ADP-ribosylation factor 5                                 |                        |    |    |    |    |    |    |    |    |    |    |    |    |    | 2  | 4  |    |
| P98095 | FBLN2     | Fibulin-2                                                 | N-linked, O-linked     |    |    |    |    |    |    |    |    |    |    |    |    |    |    |    | 1  |
| Q01469 | FABP5     | Fatty acid-binding protein, epidermal                     |                        |    |    |    |    |    |    |    |    |    |    |    |    | 1  |    | 2  |    |
| Q01638 | IL1RL1    | Interleukin-1 receptor-like 1                             | N-linked               |    |    |    |    |    |    |    |    | 1  |    |    |    | 1  |    |    |    |
| Q03113 | GNA12     | Guanine nucleotide-binding protein subunit alpha-12       |                        |    |    |    |    |    |    |    |    |    |    |    |    |    | 2  | 2  |    |
| Q07000 | HLA-C     | HLA class I histocompatibility antigen, Cw-15 alpha chain | N-linked               |    |    |    |    |    |    |    |    |    |    |    |    |    |    |    | 5  |
| Q07157 | TJP1      | Tight junction protein ZO-1                               |                        |    |    |    |    |    |    |    |    | 1  |    |    | 1  |    |    |    |    |
| Q08043 | ACTN3     | Alpha-actinin-3                                           |                        |    |    |    |    |    |    |    |    |    |    |    |    |    |    |    | 2  |
| Q09160 | HLA-A     | HLA class I histocompatibility antigen, A-80 alpha chain  | N-linked               |    |    |    |    |    |    |    |    |    |    |    |    |    |    |    | 2  |
| Q12907 | LMAN2     | Vesicular integral-membrane protein VIP36                 | N-linked               |    |    |    |    |    |    |    |    |    |    |    | 1  |    |    |    | 2  |
| Q12913 | PTPRJ     | Receptor-type tyrosine-protein phosphatase eta            | N-linked               |    |    |    |    |    |    |    |    |    |    |    |    | 1  |    |    |    |
| Q13011 | ECH1      | Delta                                                     |                        |    |    |    |    |    |    |    |    |    |    |    |    |    |    |    | 4  |
| Q13033 | STRN3     | Striatin-3                                                |                        |    |    |    |    |    |    |    |    |    |    |    |    |    |    |    | 2  |
| Q13443 | ADAM9     | Disintegrin metalloproteinase domain-containing protein 9 | N-linked               |    |    |    |    |    |    |    |    |    |    |    |    | 1  |    |    |    |
| Q14240 | EIF4A2    | Eukaryotic initiation factor 4A-II                        |                        |    |    |    |    |    |    |    |    |    |    |    |    |    | 2  | 2  |    |
| Q14344 | GNA13     | Guanine nucleotide-binding protein subunit alpha-13       |                        |    |    |    |    |    |    |    |    |    |    |    |    |    | 2  | 2  |    |
| Q14651 | PLS1      | Plastin-1                                                 |                        |    |    |    |    |    |    |    |    |    |    |    |    |    |    |    | 2  |
| Q14697 | GANAB     | Neutral alpha-glucosidase AB                              | N-linked               |    |    |    |    |    |    |    |    |    |    |    |    |    |    | 3  | 5  |
| Q14814 | MEF2D     | Myocyte-specific enhancer factor 2D                       |                        |    |    |    |    |    |    |    |    |    |    |    | 1  |    |    |    |    |
| Q14964 | RAB39A    | Ras-related protein Rab-39A                               |                        |    |    |    |    |    |    |    |    |    |    |    |    |    | 2  | 2  | 2  |
| Q15075 | EEA1      | Early endosome antigen 1                                  |                        |    |    |    |    |    |    |    |    |    |    |    | 1  |    |    |    |    |





| ACCN   | Gene Name     | Protein Name                                                     | Annotated Glycosylated | N1 | N2 | N3 | N4 | N5 | N6 | N7 | N8 | C1 | C2 | C3 | C4 | C5 | C6 | C7 | C8 |
|--------|---------------|------------------------------------------------------------------|------------------------|----|----|----|----|----|----|----|----|----|----|----|----|----|----|----|----|
| Q58FF6 | HSP90AB4<br>P | Putative heat shock protein HSP 90-beta 4                        |                        |    |    |    |    |    |    |    |    |    |    |    |    |    |    |    | 3  |
| Q58FF7 | HSP90AB3<br>P | Putative heat shock protein HSP 90-beta-3                        |                        |    |    |    |    |    |    |    |    |    |    |    |    |    |    |    | 5  |
| Q58FG0 | HSP90AA5<br>P | Putative heat shock protein HSP 90-alpha A5                      |                        |    |    |    |    |    |    |    |    |    |    |    |    |    |    |    | 1  |
| Q5BJF6 | ODF2          | Outer dense fiber protein 2                                      |                        |    |    |    |    |    |    |    |    |    |    |    |    | 2  |    |    |    |
| Q5JR59 | MTUS2         | Microtubule-associated tumor suppressor candidate 2              |                        |    |    |    |    |    |    |    |    |    |    |    |    | 1  |    |    |    |
| Q5JWF2 | GNAS          | Guanine nucleotide-binding protein G                             |                        |    |    |    |    |    |    |    |    |    |    |    |    |    | 2  | 2  |    |
| Q5JXB2 | UBE2NL        | Putative ubiquitin-conjugating enzyme E2 N-like                  |                        |    |    |    |    |    |    |    |    |    |    |    |    |    | 1  | 1  |    |
| Q5TZA2 | CROCC         | Rootletin                                                        |                        |    |    |    |    |    |    |    |    |    |    |    |    |    | 1  | 2  |    |
| Q5VZ19 | TDRD10        | Tudor domain-containing protein 10                               |                        |    |    |    |    |    |    |    |    | 2  | 2  | 2  |    | 2  |    |    |    |
| Q5Y7A7 | HLA-DRB1      | HLA class II histocompatibility antigen, DRB1-13 beta chain      | N-linked               |    |    |    |    |    |    |    |    |    |    |    |    |    |    |    | 4  |
| Q5ZPR3 | CD276         | CD276 antigen                                                    | N-linked               |    |    |    |    |    |    |    |    |    |    |    |    |    |    |    | 1  |
| Q6IQ22 | RAB12         | Ras-related protein Rab-12                                       |                        |    |    |    |    |    |    |    |    |    |    |    |    |    |    |    | 2  |
| Q6TFL3 | CCDC171       | Coiled-coil domain-containing protein 171                        |                        |    |    |    |    |    |    |    |    |    |    |    |    |    | 2  |    |    |
| Q6UWV6 | ENPP7         | Ectonucleotide pyrophosphatase/phosphodiesterase family member 7 | N-linked               |    |    |    |    |    |    |    |    |    |    |    |    |    | 2  |    |    |
| Q6UXD5 | SEZ6L2        | Seizure 6-like protein 2                                         | N-linked               |    |    |    |    |    |    |    |    | 1  |    |    |    |    |    |    |    |
| Q6WRI0 | IGSF10        | Immunoglobulin superfamily member 10                             | N-linked               |    |    |    |    |    |    |    |    |    |    |    |    |    | 1  |    |    |
| Q7Z7M0 | MEGF8         | Multiple epidermal growth factor-like domains protein 8          | N-linked               |    |    |    |    |    |    |    |    |    |    |    |    |    |    |    | 1  |
| Q86YS6 | RAB43         | Ras-related protein Rab-43                                       |                        |    |    |    |    |    |    |    |    |    |    |    |    |    |    |    | 2  |
| Q86YS7 | C2CD5         | C2 domain-containing protein 5                                   |                        |    |    |    |    |    |    |    |    |    |    |    | 2  |    |    |    |    |
| Q8IYM9 | TRIM22        | E3 ubiquitin-protein ligase TRIM22                               |                        |    |    |    |    |    |    |    |    | 1  |    |    | 1  |    |    |    |    |
| Q8IZA0 | KIAA0319L     | Dyslexia-associated protein KIAA0319-like protein                | N-linked               |    |    |    |    |    |    |    |    | 1  |    |    |    |    |    |    |    |
| Q8IZF2 | ADGRF5        | Adhesion G protein-coupled receptor F5                           | N-linked               |    |    |    |    |    |    |    |    |    | 1  | 1  |    |    |    |    |    |
| Q8N8E3 | CEP112        | Centrosomal protein of 112 kDa                                   |                        |    |    |    |    |    |    |    |    | 1  |    |    | 1  |    |    |    |    |
| Q8NBS9 | TXNDC5        | Thioredoxin domain-containing protein 5                          |                        |    |    |    |    |    |    |    |    |    |    |    |    |    |    |    | 4  |
| Q8NC54 | KCT2          | Keratinocyte-associated transmembrane protein 2                  | N-linked               |    |    |    |    |    |    |    |    |    |    |    |    | 1  |    |    |    |
| Q8NDX2 | SLC17A8       | Vesicular glutamate transporter 3                                | N-linked               |    |    |    |    |    |    |    |    |    |    |    |    | 1  |    |    |    |
| Q8NFZ8 | CADM4         | Cell adhesion molecule 4                                         | N-linked               |    |    |    |    |    |    |    |    |    |    |    | 1  |    |    |    |    |

| ACCN   | Gene Name | Protein Name                                                   | Annotated Glycosylated | N1 | N2 | N3 | N4 | N5 | N6 | N7 | N8 | C1 | C2 | C3 | C4 | C5 | C6 | C7 | C8 |
|--------|-----------|----------------------------------------------------------------|------------------------|----|----|----|----|----|----|----|----|----|----|----|----|----|----|----|----|
| Q8NHP8 | PLBD2     | Putative phospholipase B-like 2                                | N-linked               |    |    |    |    |    |    |    |    |    |    |    | 1  |    |    |    |    |
| Q8TD06 | AGR3      | Anterior gradient protein 3                                    |                        |    |    |    |    |    |    |    |    |    |    |    |    |    |    |    | 2  |
| Q8TDR0 | TRAF3IP1  | TRAF3-interacting protein 1                                    |                        |    |    |    |    |    |    |    |    |    |    |    | 1  | 1  |    |    |    |
| Q8TEQ0 | SNX29     | Sorting nexin-29                                               |                        |    |    |    |    |    |    |    |    | 2  |    | 2  |    |    |    |    |    |
| Q8WTV0 | SCARB1    | Scavenger receptor class B member 1                            | N-linked               |    |    |    |    |    |    |    |    |    |    | 1  |    | 1  |    | 2  |    |
| Q92930 | RAB8B     | Ras-related protein Rab-8B                                     |                        |    |    |    |    |    |    |    |    |    |    |    |    |    |    |    | 3  |
| Q95365 | HLA-B     | HLA class I histocompatibility antigen, B-38 alpha chain       | N-linked               |    |    |    |    |    |    |    |    |    |    |    |    |    | 6  |    |    |
| Q95604 | HLA-C     | HLA class I histocompatibility antigen, Cw-17 alpha chain      | N-linked               |    |    |    |    |    |    |    |    |    |    |    |    |    |    |    | 4  |
| Q95IE3 | HLA-DRB1  | HLA class II histocompatibility antigen, DRB1-12 beta chain    | N-linked               |    |    |    |    |    |    |    |    |    |    |    |    |    |    |    | 2  |
| Q969X5 | ERGIC1    | Endoplasmic reticulum-Golgi intermediate compartment protein 1 | N-linked               |    |    |    |    |    |    |    |    |    |    |    |    |    | 1  | 2  | 1  |
| Q96AX2 | RAB37     | Ras-related protein Rab-37                                     |                        |    |    |    |    |    |    |    |    |    |    |    |    |    |    |    | 2  |
| Q96DA2 | RAB39B    | Ras-related protein Rab-39B                                    |                        |    |    |    |    |    |    |    |    |    |    |    |    |    |    |    | 2  |
| Q96DC7 | TMCO6     | Transmembrane and coiled-coil domain-containing protein 6      |                        |    |    |    |    |    |    |    |    |    |    |    |    |    |    |    | 2  |
| Q96E17 | RAB3C     | Ras-related protein Rab-3C                                     |                        |    |    |    |    |    |    |    |    |    |    |    |    |    |    |    | 2  |
| Q96HE7 | ERO1A     | ERO1-like protein alpha                                        | N-linked               |    |    |    |    |    |    |    |    |    |    |    | 1  |    | 1  | 1  |    |
| Q96HL8 | SH3YL1    | SH3 domain-containing YSC84-like protein 1                     |                        |    |    |    |    |    |    |    |    | 1  |    |    |    |    |    |    |    |
| Q96HR9 | REEP6     | Receptor expression-enhancing protein 6                        |                        |    |    |    |    |    |    |    |    |    |    |    | 1  | 1  |    |    | 1  |
| Q96NY8 | NECTIN4   | Nectin-4                                                       | N-linked               |    |    |    |    |    |    |    |    | 1  |    |    |    |    |    |    |    |
| Q96PQ0 | SORCS2    | VPS10 domain-containing receptor SorCS2                        | N-linked               |    |    |    |    |    |    |    |    |    |    |    |    |    | 1  |    |    |
| Q99538 | LGMN      | Legumain                                                       | N-linked               |    |    |    |    |    |    |    |    |    | 1  | 1  | 1  | 1  |    |    | 2  |
| Q99623 | PHB2      | Prohibitin-2                                                   |                        |    |    |    |    |    |    |    |    |    |    |    |    |    |    |    | 2  |
| Q9BQ51 | PDCD1LG2  | Programmed cell death 1 ligand 2                               | N-linked               |    |    |    |    |    |    |    |    |    |    |    |    |    |    |    | 1  |
| Q9BTY2 | FUCA2     | Plasma alpha-L-fucosidase                                      | N-linked               |    |    |    |    |    |    |    |    |    |    |    |    |    |    |    | 1  |
| Q9BYT9 | ANO3      | Anoctamin-3                                                    | N-linked               |    |    |    |    |    |    |    |    |    |    |    | 1  |    |    |    |    |
| Q9H082 | RAB33B    | Ras-related protein Rab-33B                                    |                        |    |    |    |    |    |    |    |    |    |    |    |    |    | 2  | 2  | 2  |
| Q9H0U4 | RAB1B     | Ras-related protein Rab-1B                                     |                        |    |    |    |    |    |    |    |    |    |    |    |    |    | 5  | 6  | 3  |
| Q9H0V1 | TMEM168   | Transmembrane protein 168                                      | N-linked               |    |    |    |    |    |    |    |    |    | 1  |    |    |    |    |    |    |

| ACCN   | Gene Name  | Protein Name                                             | Annotated Glycosylated | N1 | N2 | N3 | N4 | N5 | N6 | N7 | N8 | C1 | C2 | C3 | C4 | C5 | C6 | C7 | C8 |
|--------|------------|----------------------------------------------------------|------------------------|----|----|----|----|----|----|----|----|----|----|----|----|----|----|----|----|
| Q9H3K2 | GHITM      | Growth hormone-inducible transmembrane protein           |                        |    |    |    |    |    |    |    |    |    |    |    | 1  |    |    |    |    |
| Q9H3R2 | MUC13      | Mucin-13                                                 | N-linked               |    |    |    |    |    |    |    |    |    |    |    | 1  |    |    |    |    |
| Q9H3Z4 | DNAJC5     | DnaJ homolog subfamily C member 5                        |                        |    |    |    |    |    |    |    |    |    |    |    |    |    |    |    | 1  |
| Q9H8J5 | MANSC1     | MANSC domain-containing protein 1                        | N-linked               |    |    |    |    |    |    |    |    | 1  |    |    |    | 1  |    |    |    |
| Q9HAU0 | PLEKHA5    | Pleckstrin homology domain-containing family A member 5  |                        |    |    |    |    |    |    |    |    |    |    |    | 1  |    |    |    |    |
| Q9HB40 | SCPEP1     | Retinoid-inducible serine carboxypeptidase               | N-linked               |    |    |    |    |    |    |    |    |    |    |    |    |    |    | 2  |    |
| Q9HC07 | TMEM165    | Transmembrane protein 165                                |                        |    |    |    |    |    |    |    |    |    |    |    |    |    |    | 2  |    |
| Q9HD45 | TM9SF3     | Transmembrane 9 superfamily member 3                     | N-linked               |    |    |    |    |    |    |    |    |    |    |    |    |    | 1  | 2  |    |
| Q9HDC9 | APMAP      | Adipocyte plasma membrane-associated protein             | N-linked               |    |    |    |    |    |    |    |    |    |    |    |    |    | 4  | 4  | 7  |
| Q9NPR9 | GPR108     | Protein GPR108                                           | N-linked               |    |    |    |    |    |    |    |    |    |    |    |    |    |    | 1  |    |
| Q9NQH7 | XPNPEP3    | Probable Xaa-Pro aminopeptidase 3                        |                        |    |    |    |    |    |    |    |    |    |    |    |    |    |    | 1  | 1  |
| Q9NRW1 | RAB6B      | Ras-related protein Rab-6B                               |                        |    |    |    |    |    |    |    |    |    |    |    |    |    | 2  | 2  | 2  |
| Q9NUN5 | LMBRD1     | Probable lysosomal cobalamin transporter                 | N-linked               |    |    |    |    |    |    |    |    |    |    |    |    |    | 2  | 2  | 1  |
| Q9NV96 | TMEM30A    | Cell cycle control protein 50A                           | N-linked               |    |    |    |    |    |    |    |    |    | 1  | 1  |    |    | 1  |    |    |
| Q9NYL4 | FKBP11     | Peptidyl-prolyl cis-trans isomerase FKBP11               |                        |    |    |    |    |    |    |    |    |    |    |    | 1  | 1  |    |    |    |
| Q9NZ56 | FMN2       | Formin-2                                                 |                        |    |    |    |    |    |    |    |    |    |    |    |    |    |    |    | 2  |
| Q9P2G4 | MAP10      | Microtubule-associated protein 10                        |                        |    |    |    |    |    |    |    |    |    | 1  | 1  |    |    |    |    |    |
| Q9TNN7 | HLA-C      | HLA class I histocompatibility antigen, Cw-5 alpha chain | N-linked               |    |    |    |    |    |    |    |    |    |    |    |    |    |    |    | 4  |
| Q9UFN0 | NIPSNAP3 A | Protein NipSnap homolog 3A                               |                        |    |    |    |    |    |    |    |    |    |    |    |    |    |    | 1  | 2  |
| Q9UHC9 | NPC1L1     | Niemann-Pick C1-like protein 1                           | N-linked               |    |    |    |    |    |    |    |    |    |    |    |    |    | 1  | 2  |    |
| Q9UHG3 | PCYOX1     | Preylcysteine oxidase 1                                  | N-linked               |    |    |    |    |    |    |    |    |    |    |    |    |    | 4  | 6  | 3  |
| Q9UPA5 | BSN        | Protein bassoon                                          | O-linked               |    |    |    |    |    |    |    |    |    |    |    | 1  |    |    |    |    |
| Q9UPZ6 | THSD7A     | Thrombospondin type-1 domain-containing protein 7A       | N-linked               |    |    |    |    |    |    |    |    |    |    |    | 1  |    |    |    |    |
| Q9Y281 | CFL2       | Cofilin-2                                                |                        |    |    |    |    |    |    |    |    |    |    |    |    |    |    |    | 2  |
| Q9Y394 | DHRS7      | Dehydrogenase/reductase SDR family member 7              |                        |    |    |    |    |    |    |    |    |    |    |    |    |    | 2  | 6  | 2  |
| Q9Y646 | CPQ        | Carboxypeptidase Q                                       | N-linked               |    |    |    |    |    |    |    |    |    |    |    | 1  | 3  |    |    |    |
| Q9Y6N5 | SQRDL      | Sulfide:quinone oxidoreductase, mitochondrial            |                        |    |    |    |    |    |    |    |    |    |    |    |    |    | 1  | 1  | 1  |
